# Supplementary material
Source: PubMed Central journal article supplement (PMC7028356)
Supplement: NIHMS1068837-supplement-Appendix_1.pdf [file NIHMS1068837-supplement-Appendix_1.pdf]

## *APPENDIX*

### Contents

|                                  |       |
|----------------------------------|-------|
| Suppression Rates.....           | 2     |
| Generalized Additive Models..... | 3     |
| Appendix Exhibit 1.....          | 4     |
| Appendix Exhibit 2.....          | 5     |
| Appendix Exhibit 3.....          | 6     |
| Appendix Exhibit 4.....          | 7     |
| Appendix Exhibit 5.....          | 8     |
| Appendix Exhibit 6.....          | 9     |
| Appendix Exhibit 7.....          | 10    |
| Appendix Exhibit 8.....          | 11    |
| Appendix Exhibit 9.....          | 12    |
| Appendix Exhibit 10.....         | 13-15 |
| Appendix Exhibit 11.....         | 16-21 |

### *Suppression Rates*

None of the 969 total mortality rates (51 states/DC, 19 years) were suppressed or deemed unreliable. In sub-analyses by year, there was high suppression among Asian/Pacific Islander (91.8%) and Native Alaskan/American Indian (90.0%), as well as the youngest age groups (100.0% for <1 and 1-4, and 94.9% for ages 5-14) and the age 85+ group (80.3%). Unintentional death (77.2%) was also highly suppressed; each of those categories were excluded from the sub-population analyses. The next most censored category, which was largely state-specific, was Hispanic white (58.3%). Among the remaining 14,535 rates (15 categories, 51 states/DC, 19 years), 2,989 (20.6%) were suppressed, and 506 (16.9%) of those could be interpolated as described above.

In the aggregated analyses of 1999-2014 and 2015-2017 there was far less suppression but some groups still required exclusion due to high suppression. Age under 1 was suppressed in 98.0% of states/DC in 1999-2014, and 100.0% of states/DX in 2015-2017. Age 1-4 was suppressed in 98.0% and 60.8% of cases in 1999-2014 and 2015-2017, respectively. Age 5-14 was suppressed in 17.6% of cases in 1999-2014 and 56.9% of cases in 2015-2017. Native Alaskan/American Indian and Asian/Pacific Islander required omission due to high suppression in both 1999-2014 (39.2% and 25.5%, respectively) and 2015-2017 (66.7% and 51.0%, respectively). Among the remaining categories, 23 (2.5%) were suppressed in 1999-2014 and 51 (5.6%) were suppressed in 2015-2017, primarily owing to unintentional death, Hispanic ethnicity, and the older age groups (75-84, 85+).

## *Generalized Additive Models*

We characterized trajectories of firearm mortality using generalized additive models (GAMs),<sup>1</sup> a regression-based approach to estimating the relationship between variables – year and age-adjusted mortality rate in this case – without pre-specifying its nature (e.g., linear). GAMs allow us to borrow information across years to generate a smoothly varying trajectory of mortality that is ultimately more interpretable than the raw trajectory of rates, for which the underlying trend may be obscured by random year-to-year fluctuation. A particular advantage of the GAM framework is that it empirically determines the characteristics of the temporal trajectory. Specifically, the software empirically determines the appropriate level of smoothness (between the smoothest possible function—linear—and the fully non-parametric estimate—a separate value for each of the 19 time points) using a generalized cross-validation procedure<sup>2</sup> to empirically determine. We used the R package *mgcv* to fit these models.<sup>1</sup> Within this framework, we conducted trend tests by testing whether the temporal smooth is different from zero<sup>3</sup>, comparing the GAM model with the model that constrains the temporal trajectory to be constant.

Within each demographic sub-population, and sub-type of firearm mortality, we characterized the trajectories using the GAM framework described above, slightly modified to handle highly suppressed trajectories. If over half of the trajectory was suppressed, then linear regression was used instead. If fewer than four time points were unsuppressed, no modeling was performed and raw values were reported. These trends, in addition to the overall trend, expressed as relative changes from 1999, were jointly displayed at the state level using a heatmap with the columns based on years and the rows based on the aforementioned sub-categories.

1. Wood S. *Generalized additive models: an introduction with R*. Chapman and Hall/CRC; 2017
2. Wood, S.N. (2004) Stable and efficient multiple smoothing parameter estimation for generalized additive models. *J. Amer. Statist. Ass.* 99:673-686
3. Wood, S.N. (2013a) On p-values for smooth components of an extended generalized additive model. *Biometrika* 100:221-228

Appendix Exhibit 1: Firearm mortality per 100k population, by state, sub-population and mechanism, 1999-2014.

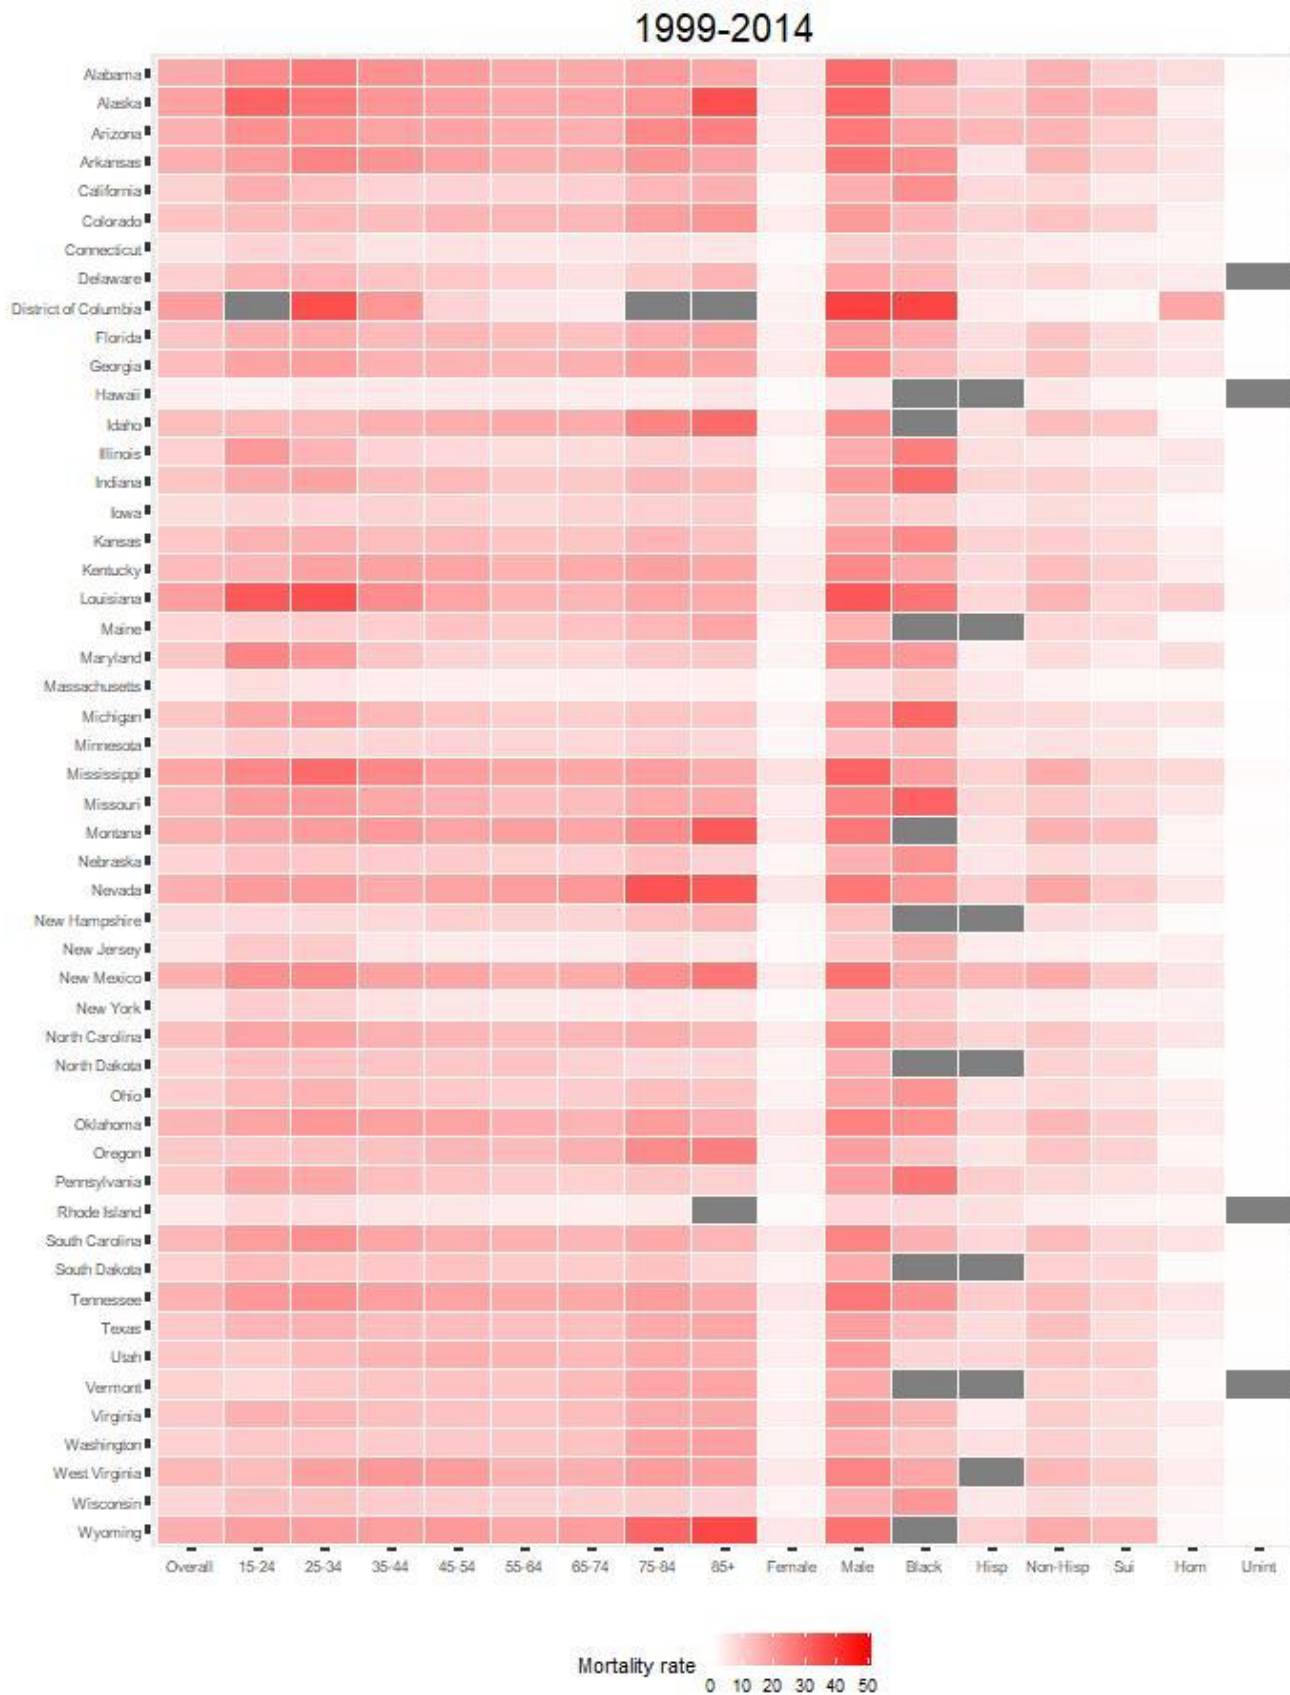

Note: Gray cells indicate suppressed counts. Rates are age-adjusted (except age-specific rates).

Appendix Exhibit 2: Firearm mortality per 100k population, by state, sub-population and mechanism, 2015-2017.

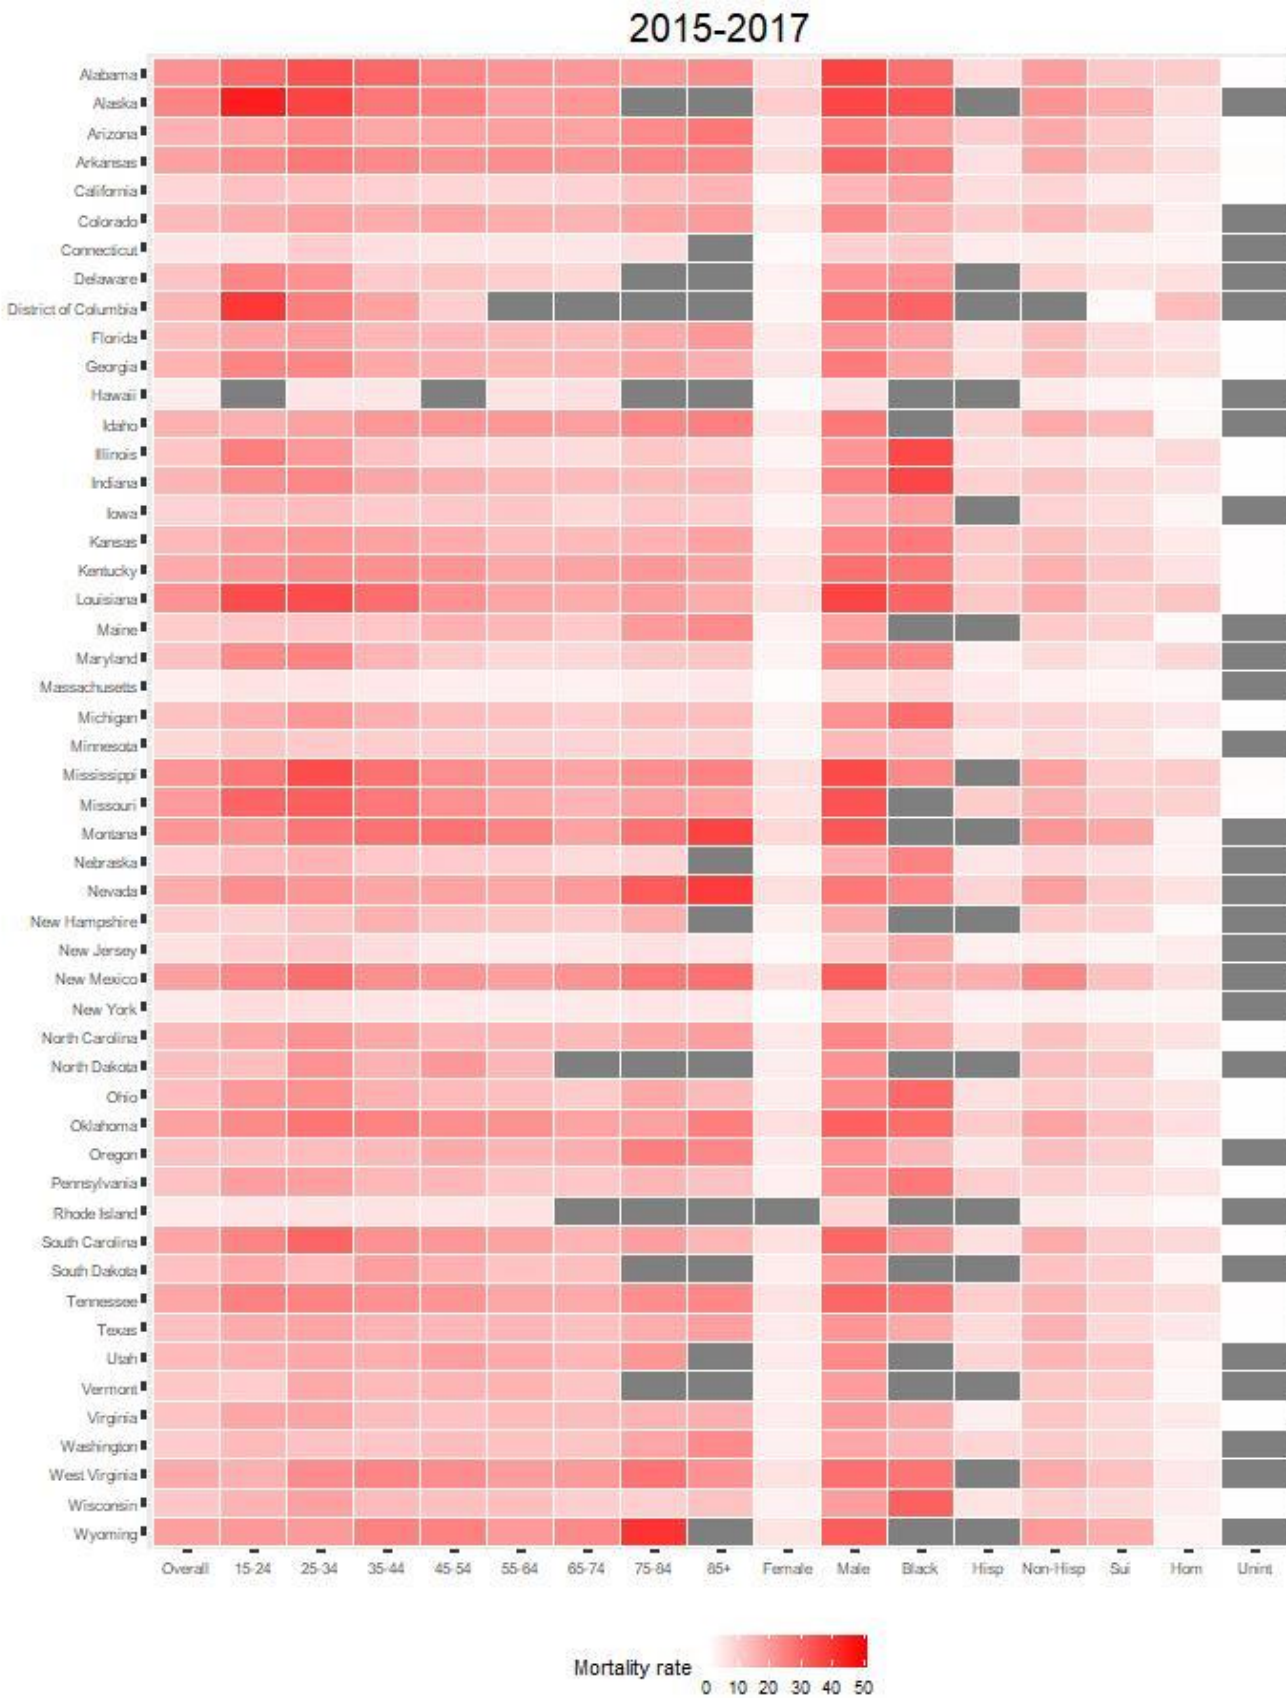

Note: Gray cells indicate suppressed counts. Rates are age-adjusted (except age-specific rates).

Appendix Exhibit 3: % change in firearm mortality, by state, sub-population and mechanism, 1999-2014 vs. 2015-2017.

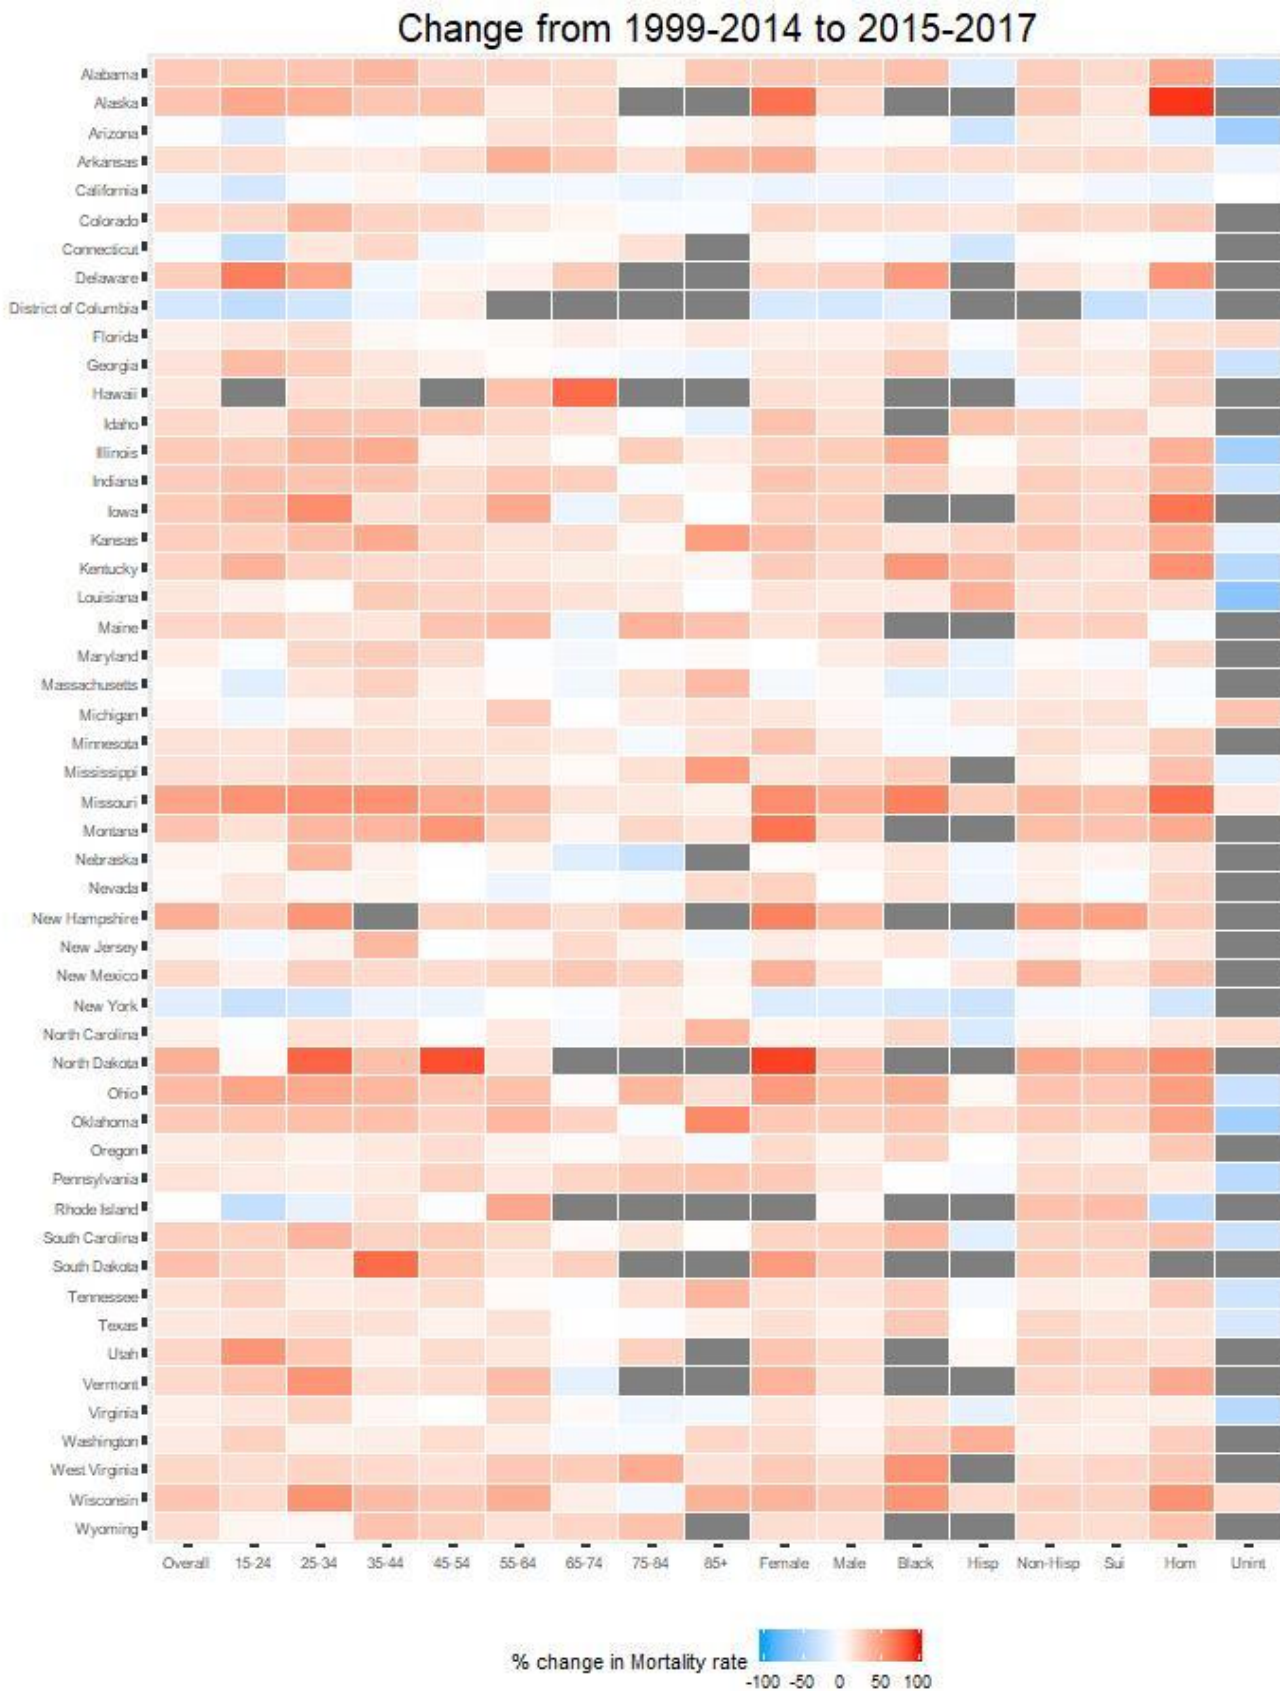

Note: Gray cells indicate suppressed counts. Rates are age-adjusted (except age-specific rates).

Appendix Exhibit 4: Firearm suicide per 100k population, by state and sub-population, 1999-2014.

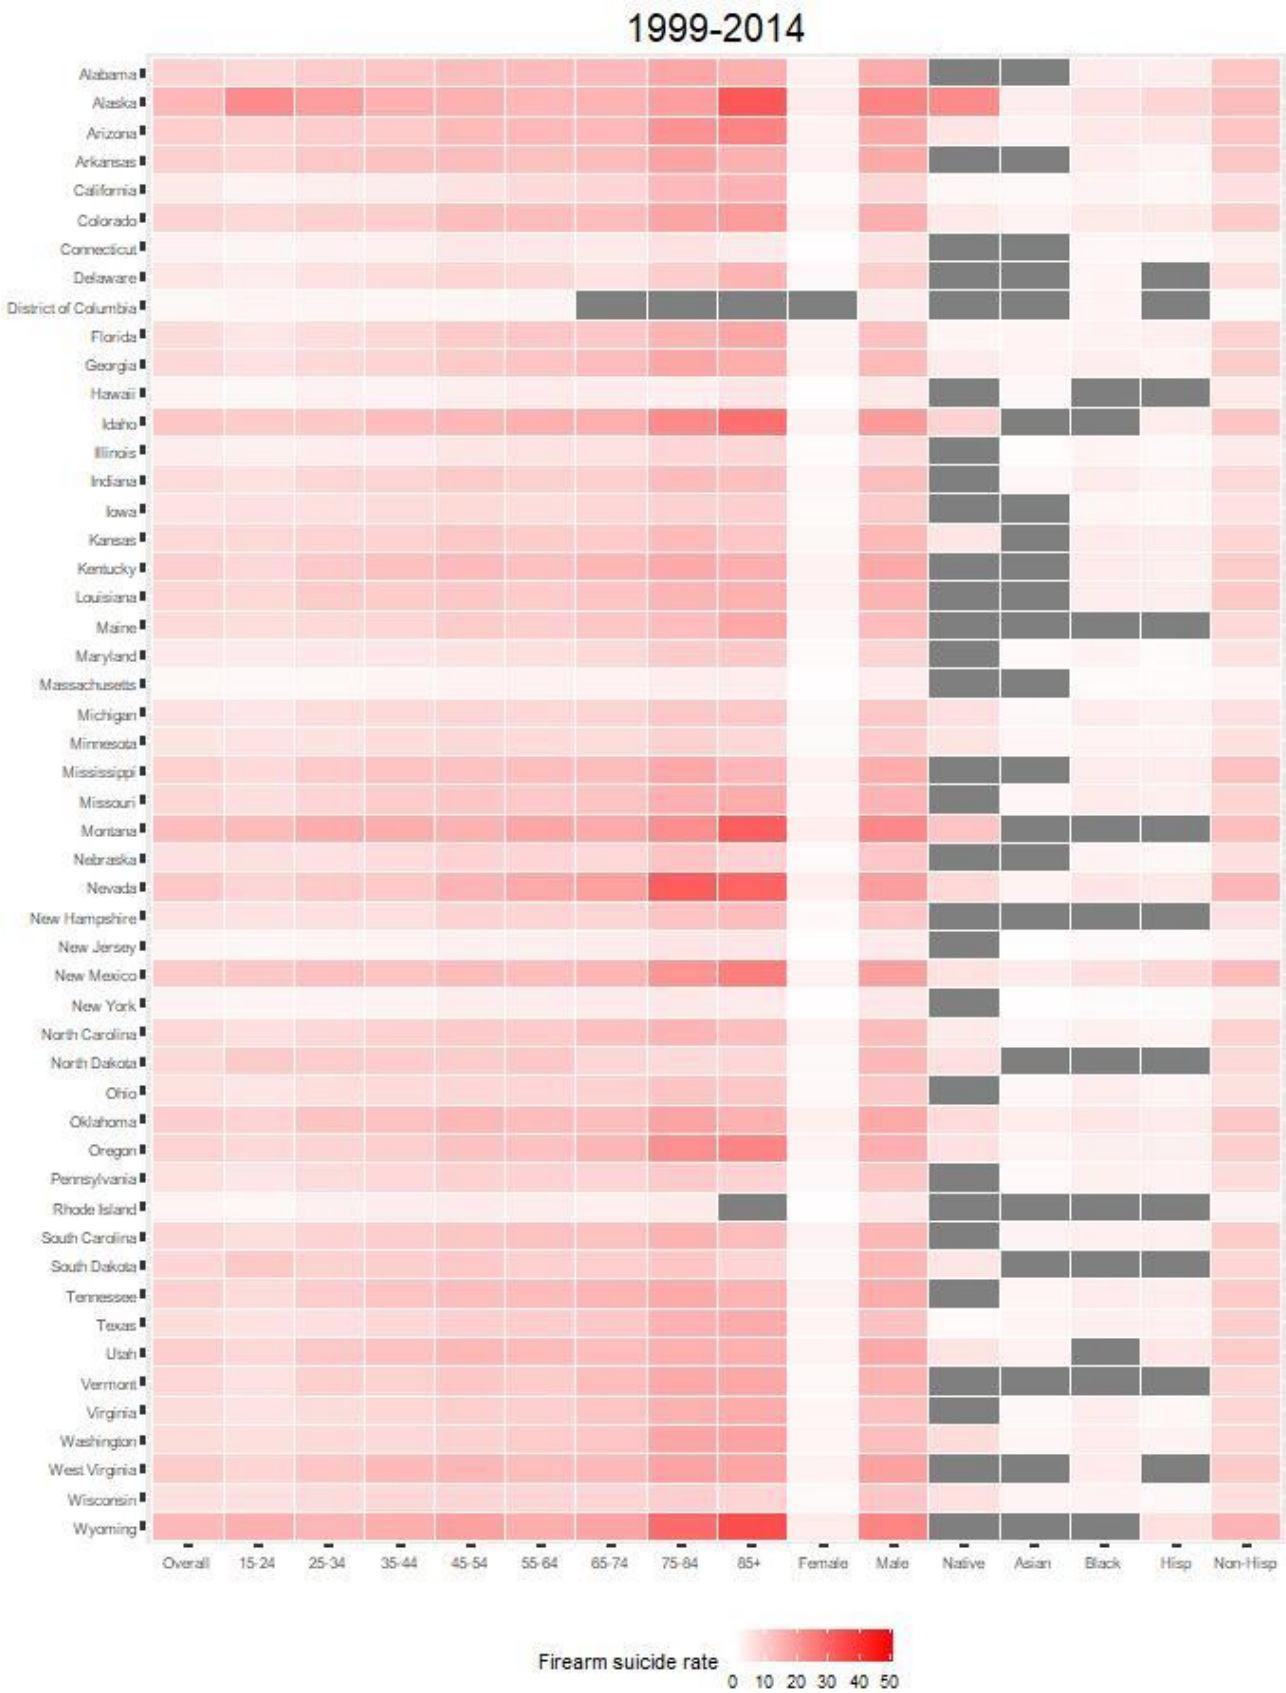

Note: Gray cells indicate suppressed counts. Rates are age-adjusted (except age-specific rates).

Appendix Exhibit 5: Firearm suicide per 100k population, by state and sub-population, 2015-2017.

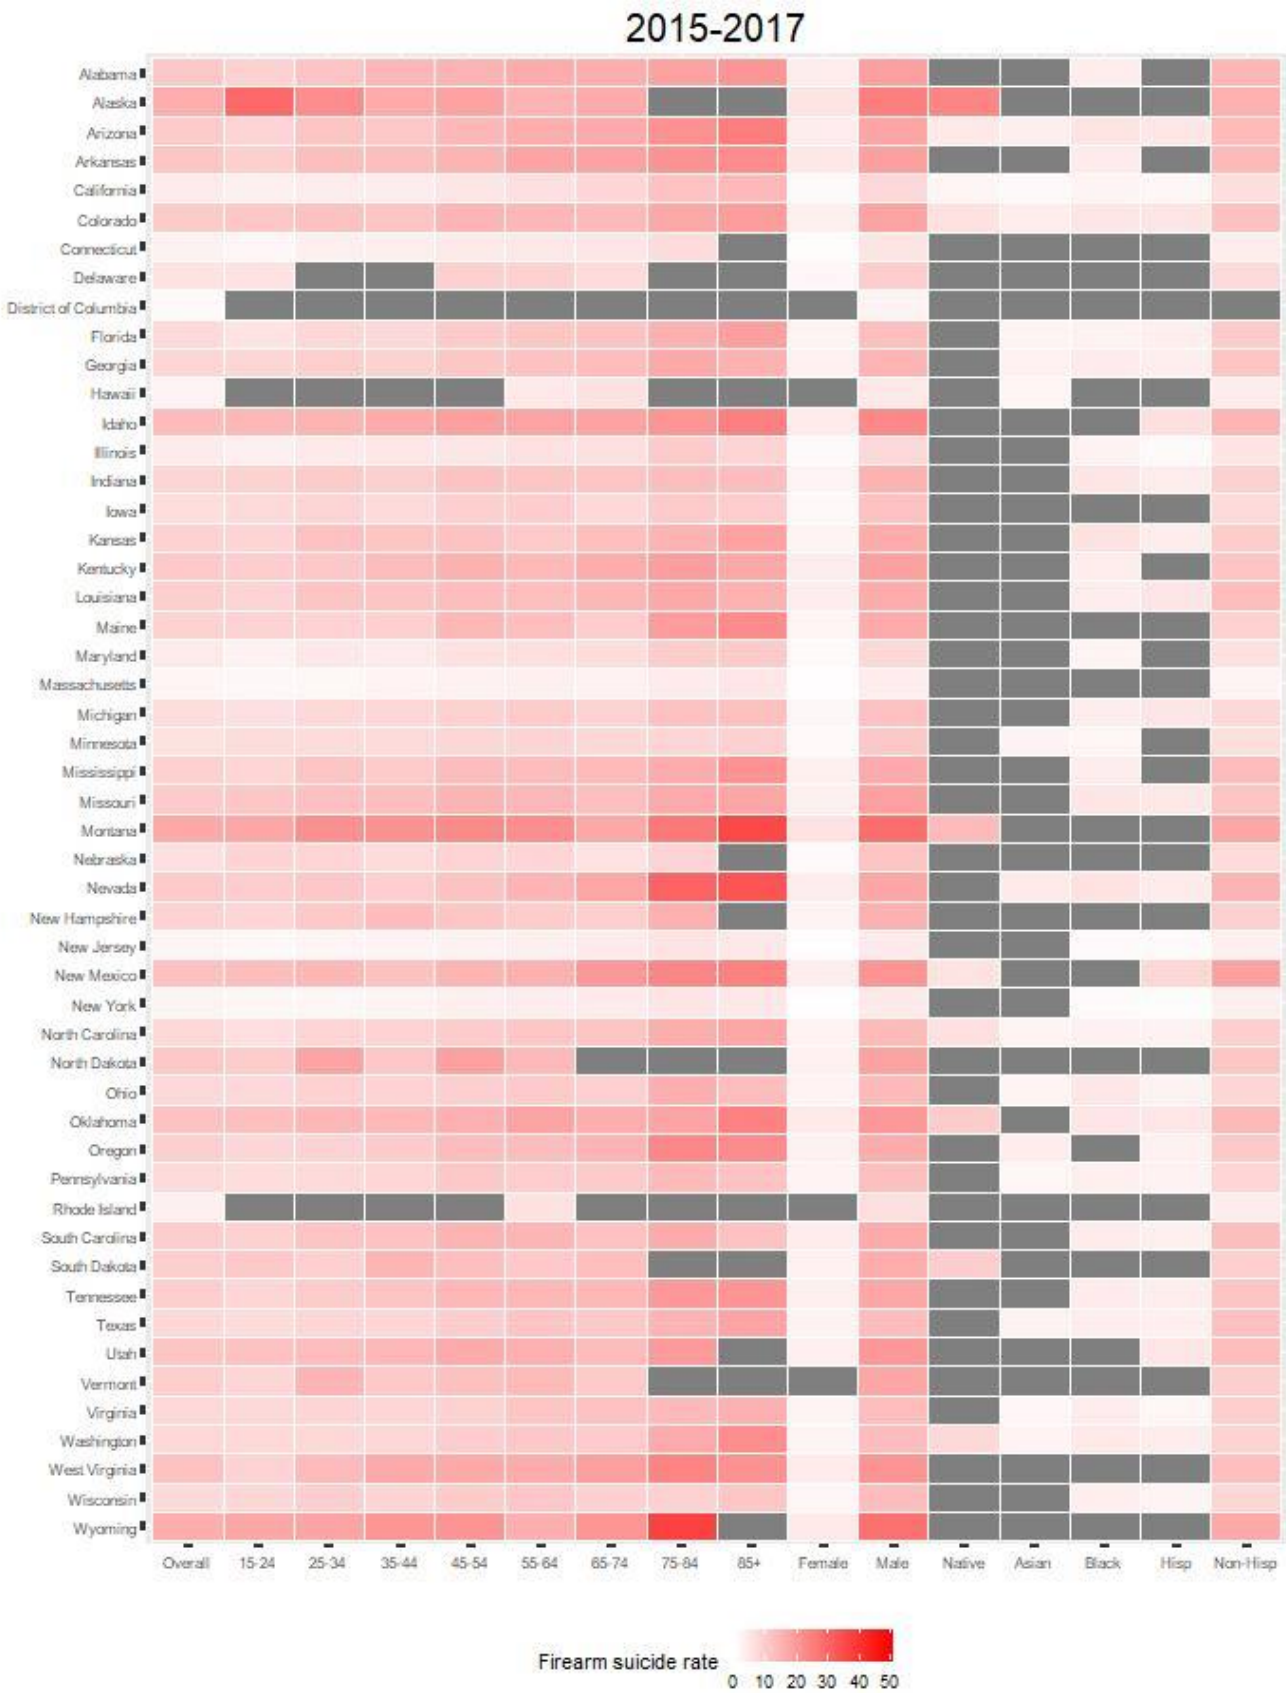

Note: Gray cells indicate suppressed counts. Rates are age-adjusted (except age-specific rates).



Appendix Exhibit 6: % change in firearm suicide, by state and sub-population, 1999-2014 vs. 2015-2017.

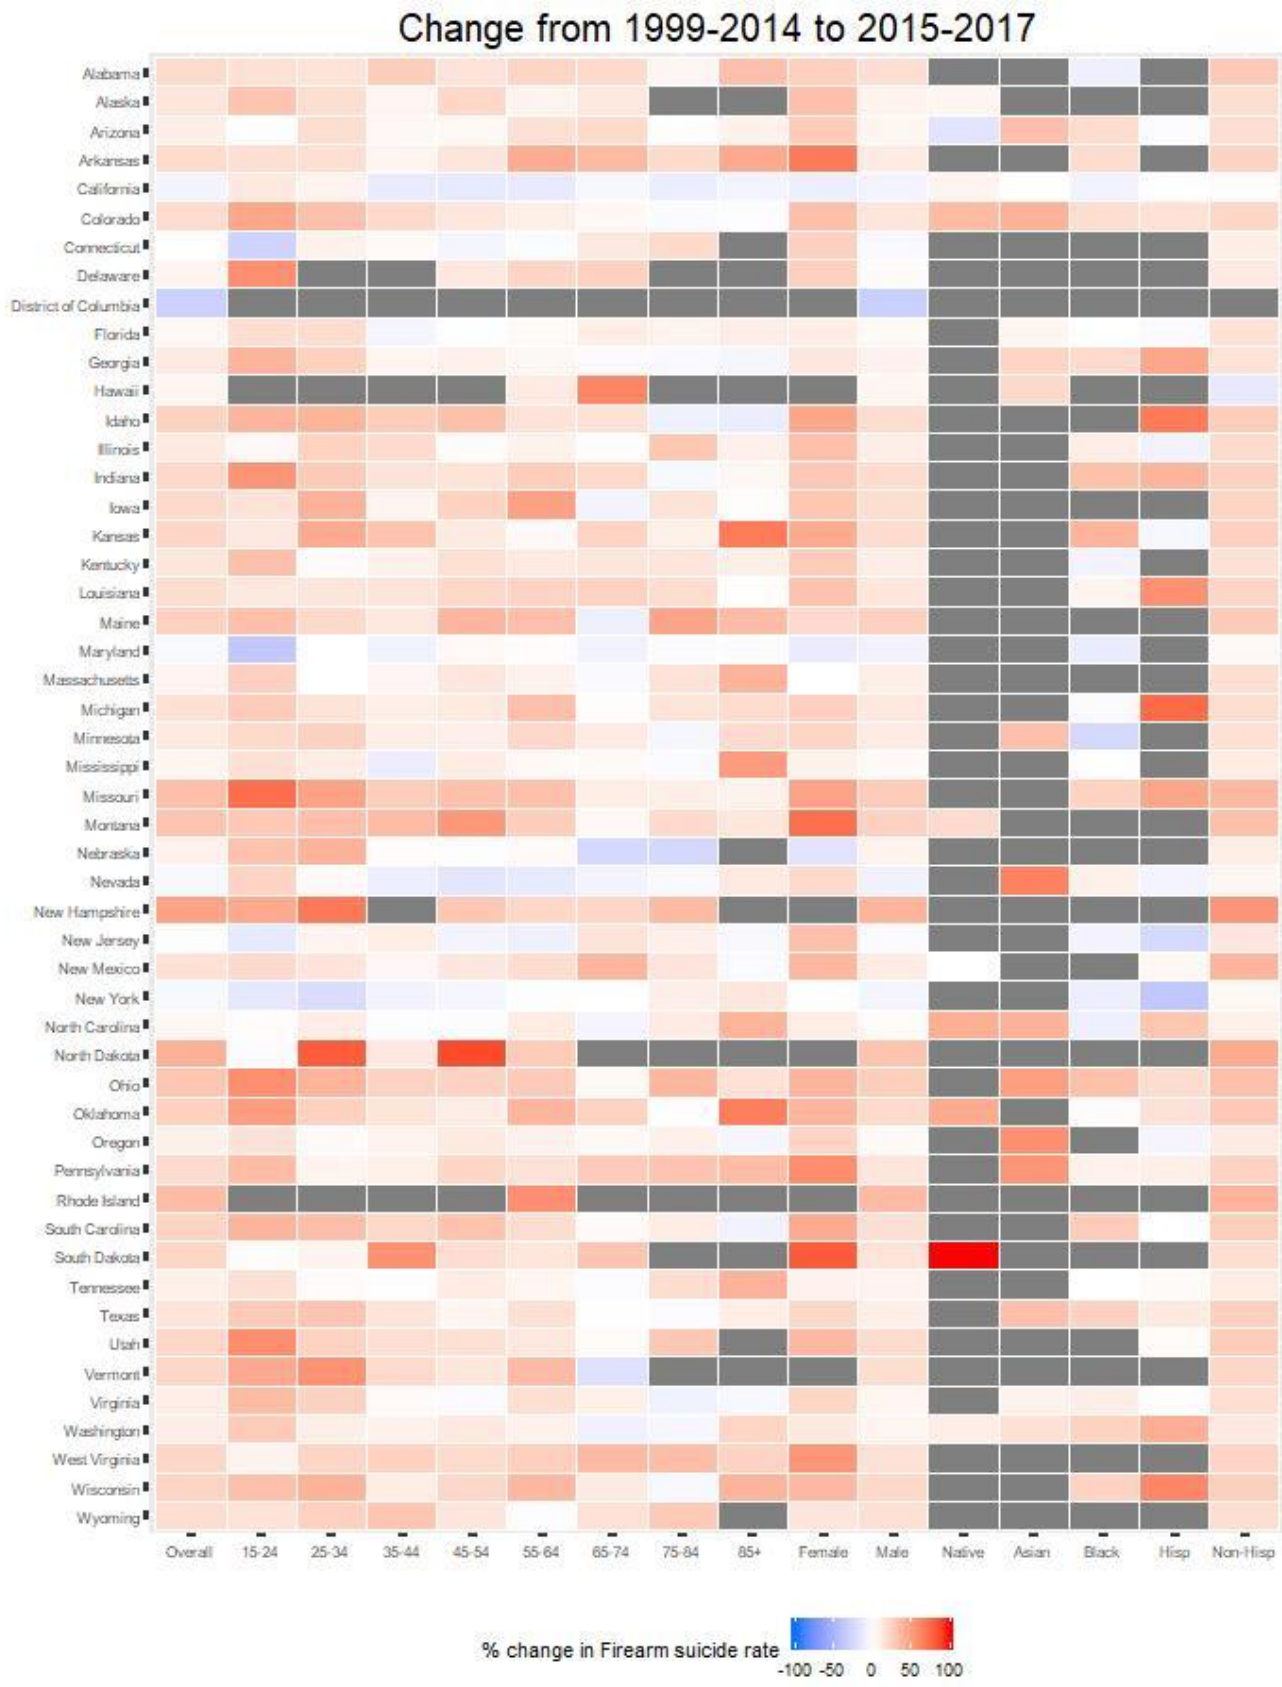

Note: Gray cells indicate suppressed counts. Rates are age-adjusted (except age-specific rates).

Appendix Exhibit 7: Firearm homicide per 100k population, by state and sub-population, 1999-2014.

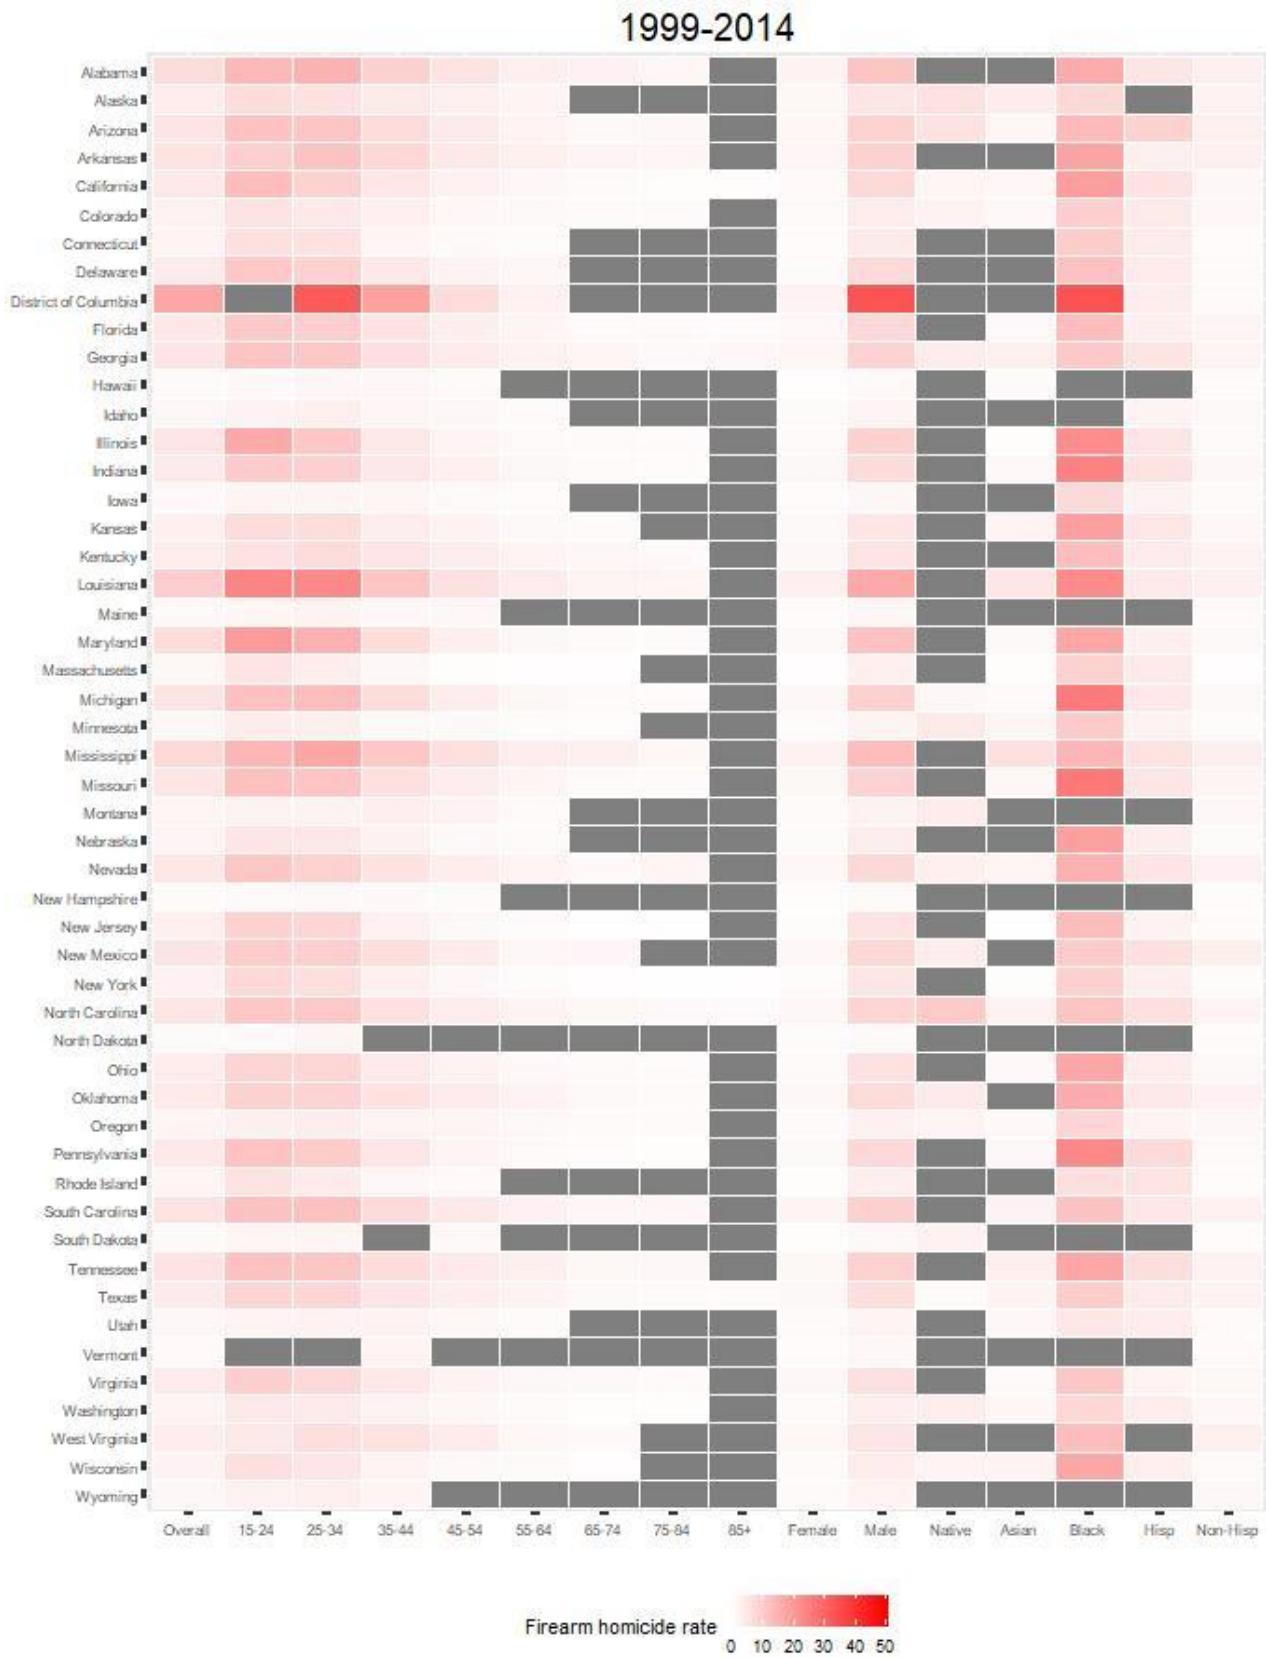

Note: Gray cells indicate suppressed counts. Rates are age-adjusted (except age-specific rates).

Appendix Exhibit 8: Firearm homicide per 100k population, by state and sub-population, 2015-2017.

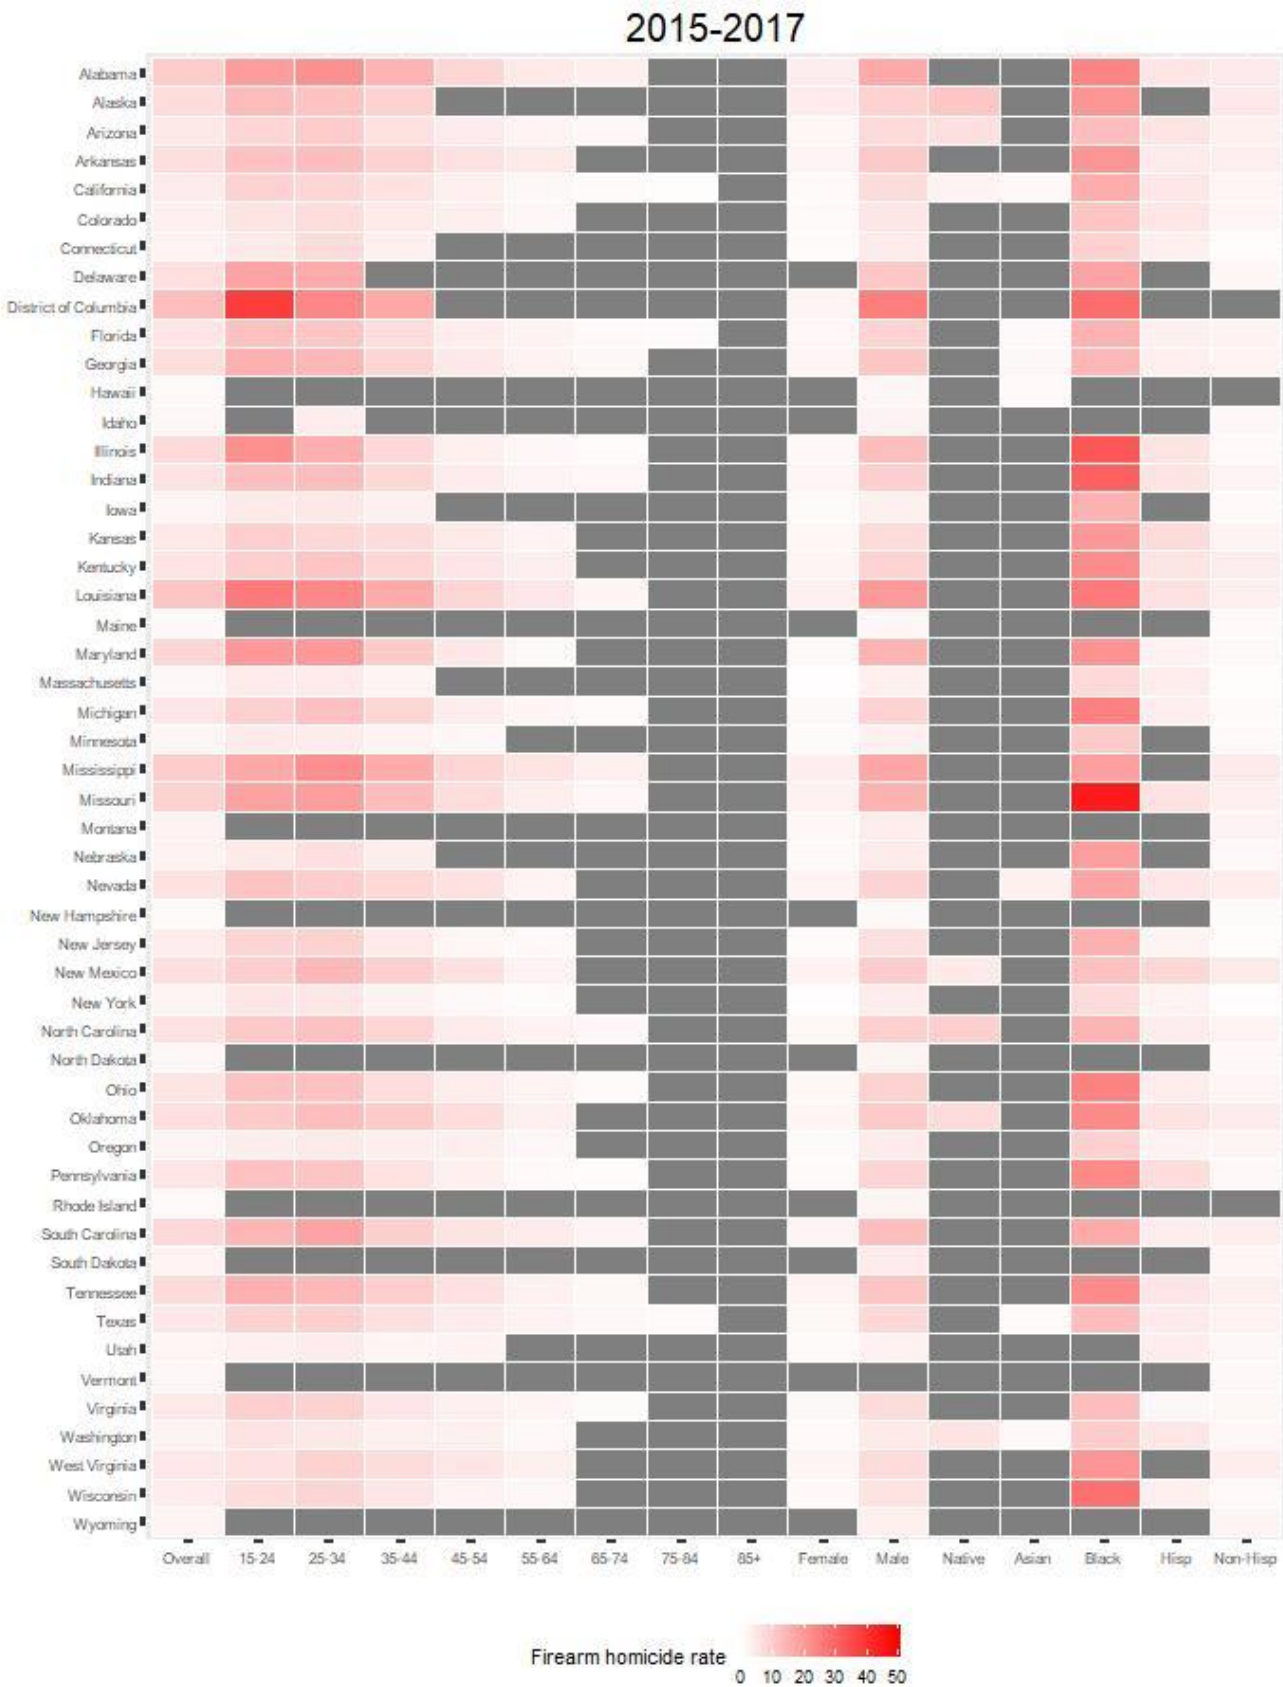

Note: Gray cells indicate suppressed counts. Rates are age-adjusted (except age-specific rates).

Appendix Exhibit 9: % change in firearm homicide, by state and sub-population, 1999-2014 vs. 2015-2017.

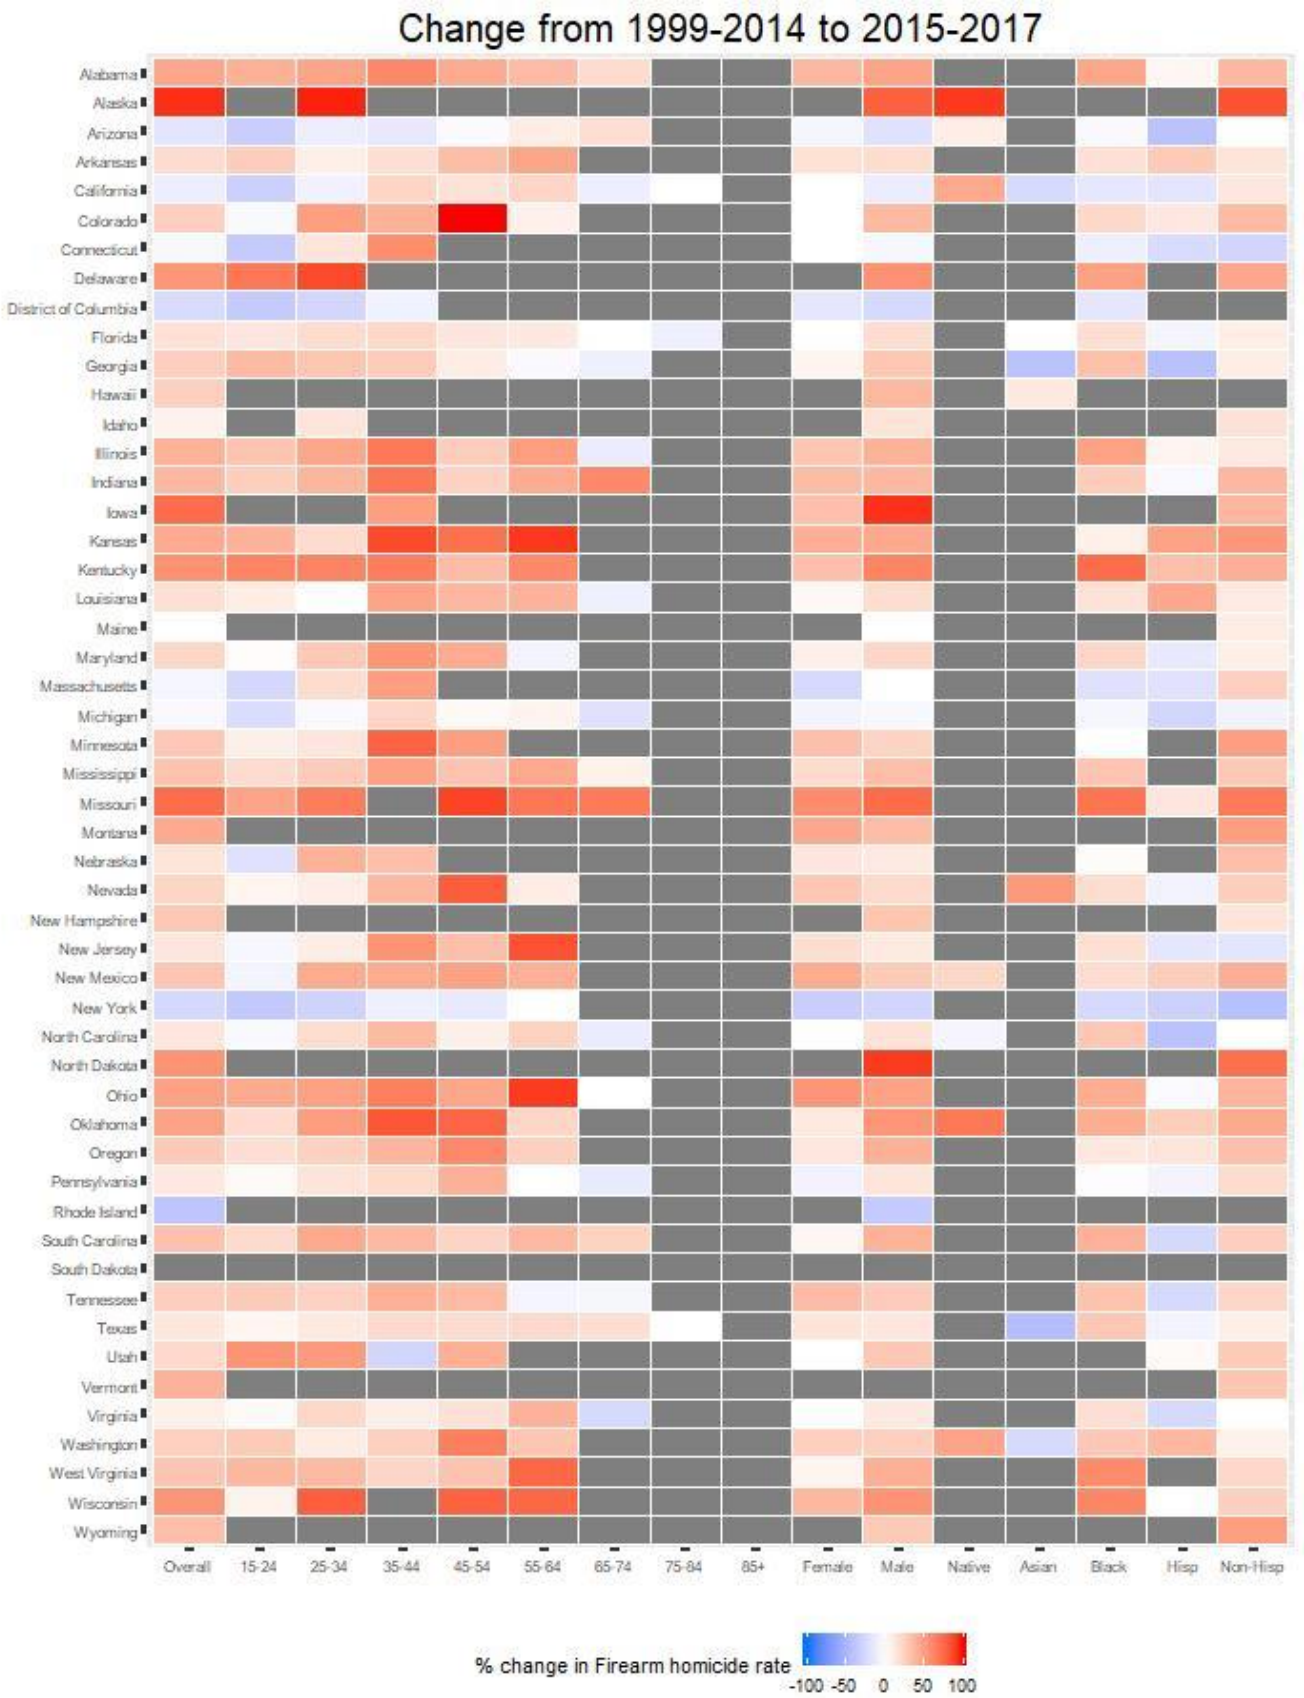

Note: Gray cells indicate suppressed counts. Rates are age-adjusted (except age-specific rates).

Appendix Exhibit 10: State-level trends in overall firearm mortality, 1999-2017.

|                      | <u>Age-Adjusted Mortality Rate</u> |                     |                     | <i>p</i> (1999-2014) | <i>p</i> (1999-2017) | 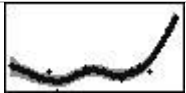   |
|----------------------|------------------------------------|---------------------|---------------------|----------------------|----------------------|---------------------------------------------------------------------------------------|
|                      | 1999                               | 2014                | 2017                |                      |                      |                                                                                       |
| Alabama              | 17.7<br>(16.5-18.9)                | 16.9<br>(15.7-18.1) | 22.9<br>(21.5-24.3) | 0.680                | <0.001               |    |
| Alaska               | 15.8<br>(12.3-20.0)                | 19.2<br>(16.0-22.4) | 24.5<br>(20.8-28.2) | 0.193                | 0.002                |    |
| Arizona              | 16.3<br>(15.2-17.5)                | 13.5<br>(12.6-14.4) | 15.8<br>(14.8-16.7) | <0.001               | 0.003                |    |
| Arkansas             | 14.6<br>(13.1-16.1)                | 16.6<br>(15.1-18.1) | 20.3<br>(18.7-21.9) | 0.020                | <0.001               |    |
| California           | 9.3<br>(8.9-9.6)                   | 7.4<br>(7.1-7.7)    | 7.9<br>(7.6-8.2)    | <0.001               | <0.001               |    |
| Colorado             | 10.8<br>(9.8-11.8)                 | 12.2<br>(11.3-13.2) | 13.4<br>(12.4-14.3) | 0.203                | <0.001               |    |
| Connecticut          | 5.9<br>(5.1-6.8)                   | 5.0<br>(4.2-5.7)    | 5.1<br>(4.4-5.9)    | 0.802                | 0.510                |    |
| Delaware             | 8.7<br>(6.7-11.0)                  | 11.1<br>(8.9-13.3)  | 11.7<br>(9.4-13.9)  | 0.006                | <0.001               |   |
| District of Columbia | 25.5<br>(21.5-29.5)                | 11.7<br>(9.2-14.5)  | 13.1<br>(10.4-15.8) | <0.001               | <0.001               |  |
| Florida              | 10.7<br>(10.1-11.2)                | 11.5<br>(11.1-12.0) | 12.4<br>(11.9-12.9) | <0.001               | <0.001               |  |
| Georgia              | 13.7<br>(12.9-14.5)                | 13.7<br>(13.0-14.4) | 15.4<br>(14.7-16.2) | 0.135                | <0.001               |  |
| Hawaii               | 3.4<br>(2.5-4.7)                   | 2.6<br>(1.9-3.6)    | 2.5<br>(1.7-3.4)    | 0.016                | 0.281                |  |
| Idaho                | 12.2<br>(10.2-14.1)                | 13.2<br>(11.4-15.0) | 16.4<br>(14.5-18.4) | 0.127                | 0.001                |  |
| Illinois             | 9.7<br>(9.1-10.2)                  | 9.0<br>(8.5-9.6)    | 12.1<br>(11.5-12.7) | 0.008                | <0.001               |  |
| Indiana              | 11.2<br>(10.3-12.0)                | 12.4<br>(11.5-13.2) | 15.3<br>(14.3-16.2) | 0.293                | <0.001               |  |
| Iowa                 | 6.8<br>(5.8-7.7)                   | 7.5<br>(6.5-8.4)    | 9.0<br>(7.9-10.1)   | 0.083                | <0.001               |  |
| Kansas               | 10.0<br>(8.8-11.2)                 | 11.3<br>(10.1-12.6) | 16.0<br>(14.5-17.5) | 0.034                | <0.001               |  |

|                |                     |                     |                     |        |        |                                                                                       |
|----------------|---------------------|---------------------|---------------------|--------|--------|---------------------------------------------------------------------------------------|
| Kentucky       | 12.9<br>(11.8-14.0) | 13.9<br>(12.8-15.1) | 16.2<br>(15.0-17.3) | 0.061  | <0.001 | 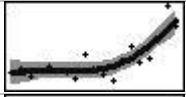    |
| Louisiana      | 17.5<br>(16.3-18.8) | 19.0<br>(17.8-20.3) | 21.7<br>(20.4-23.1) | 0.081  | <0.001 |    |
| Maine          | 8.7<br>(7.1-10.3)   | 9.4<br>(7.8-11.1)   | 11.7<br>(9.8-13.5)  | 0.002  | 0.001  |    |
| Maryland       | 12.7<br>(11.7-13.7) | 9.0<br>(8.2-9.8)    | 12.3<br>(11.4-13.2) | <0.001 | <0.001 |    |
| Massachusetts  | 3.0<br>(2.6-3.5)    | 3.2<br>(2.8-3.6)    | 3.7<br>(3.3-4.2)    | 0.055  | 0.065  |    |
| Michigan       | 11.0<br>(10.3-11.6) | 11.1<br>(10.4-11.8) | 11.3<br>(10.6-12.0) | 0.007  | 0.001  |    |
| Minnesota      | 6.1<br>(5.4-6.8)    | 6.6<br>(6.0-7.3)    | 8.2<br>(7.4-8.9)    | 0.011  | <0.001 |    |
| Mississippi    | 18.2<br>(16.7-19.8) | 18.3<br>(16.8-19.9) | 21.5<br>(19.8-23.2) | 0.312  | 0.001  |    |
| Missouri       | 12.7<br>(11.8-13.7) | 15.3<br>(14.3-16.3) | 21.5<br>(20.3-22.6) | <0.001 | <0.001 |    |
| Montana        | 13.4<br>(11.1-15.8) | 16.1<br>(13.6-18.6) | 22.5<br>(19.6-25.4) | 0.160  | <0.001 |   |
| Nebraska       | 8.6<br>(7.2-10.0)   | 9.5<br>(8.1-10.9)   | 8.3<br>(6.9-9.6)    | 0.006  | 0.005  |  |
| Nevada         | 20.0<br>(17.9-22.0) | 14.8<br>(13.4-16.2) | 16.7<br>(15.3-18.2) | <0.001 | <0.001 |  |
| New Hampshire  | 5.8<br>(4.6-7.4)    | 8.7<br>(7.1-10.3)   | 10.4<br>(8.6-12.1)  | 0.035  | <0.001 |  |
| New Jersey     | 4.4<br>(3.9-4.8)    | 5.3<br>(4.8-5.8)    | 5.3<br>(4.8-5.8)    | 0.008  | 0.002  |  |
| New Mexico     | 16.3<br>(14.4-18.2) | 16.0<br>(14.2-17.7) | 18.5<br>(16.7-20.4) | 0.068  | <0.001 |  |
| New York       | 5.3<br>(5.0-5.7)    | 4.2<br>(4.0-4.5)    | 3.7<br>(3.5-4.0)    | <0.001 | <0.001 |  |
| North Carolina | 13.1<br>(12.3-13.8) | 11.8<br>(11.1-12.5) | 13.7<br>(13.0-14.5) | <0.001 | <0.001 |  |
| North Dakota   | 7.5<br>(5.5-9.9)    | 12.3<br>(9.9-15.1)  | 13.2<br>(10.6-15.8) | <0.001 | <0.001 |  |
| Ohio           | 8.2<br>(7.7-8.8)    | 10.3<br>(9.7-10.9)  | 13.7<br>(13.0-14.4) | <0.001 | <0.001 |  |

|                |                     |                     |                     |        |        |                                                                                       |
|----------------|---------------------|---------------------|---------------------|--------|--------|---------------------------------------------------------------------------------------|
| Oklahoma       | 14.8<br>(13.5-16.1) | 15.7<br>(14.4-17.0) | 17.2<br>(15.9-18.5) | <0.001 | <0.001 |     |
| Oregon         | 11.3<br>(10.2-12.5) | 11.7<br>(10.6-12.7) | 12.1<br>(11.1-13.2) | 0.028  | <0.001 |    |
| Pennsylvania   | 9.7<br>(9.1-10.2)   | 10.5<br>(9.9-11.0)  | 12.5<br>(11.9-13.1) | <0.001 | <0.001 |    |
| Rhode Island   | 5.3<br>(4.0-6.9)    | 3.0<br>(2.0-4.2)    | 3.9<br>(2.8-5.2)    | 0.243  | 0.405  |    |
| South Carolina | 13.8<br>(12.6-14.9) | 15.5<br>(14.4-16.7) | 17.7<br>(16.5-18.9) | <0.001 | <0.001 |    |
| South Dakota   | 9.7<br>(7.6-12.2)   | 10.3<br>(8.3-12.8)  | 11.9<br>(9.5-14.2)  | 0.193  | 0.012  |    |
| Tennessee      | 14.8<br>(13.8-15.8) | 15.1<br>(14.2-16.1) | 18.4<br>(17.4-19.5) | 0.990  | <0.001 |    |
| Texas          | 10.5<br>(10.1-11.0) | 10.7<br>(10.3-11.1) | 12.4<br>(12.0-12.8) | 0.350  | <0.001 |    |
| Utah           | 9.4<br>(8.1-10.8)   | 12.3<br>(11.0-13.7) | 14.0<br>(12.6-15.4) | <0.001 | <0.001 |    |
| Vermont        | 9.3<br>(7.0-12.0)   | 10.3<br>(7.9-13.2)  | 11.7<br>(9.0-14.9)  | 0.140  | 0.010  |   |
| Virginia       | 11.7<br>(10.9-12.5) | 10.3<br>(9.6-11.0)  | 11.9<br>(11.2-12.7) | <0.001 | 0.002  |  |
| Washington     | 10.1<br>(9.3-10.9)  | 9.7<br>(9.0-10.4)   | 11.1<br>(10.3-11.9) | 0.175  | 0.021  |  |
| West Virginia  | 13.3<br>(11.6-14.9) | 14.6<br>(12.8-16.3) | 18.6<br>(16.5-20.6) | 0.058  | <0.001 |  |
| Wisconsin      | 8.3<br>(7.6-9.1)    | 8.2<br>(7.5-9.0)    | 10.6<br>(9.7-11.4)  | 0.477  | <0.001 |  |
| Wyoming        | 15.2<br>(11.9-19.1) | 16.2<br>(13.0-20.0) | 18.8<br>(15.2-22.4) | 0.074  | 0.008  |  |

Note: The p-values reported correspond to a test of whether or not the trajectory is constant (i.e. a horizontal line); in column 4 (1999-2014) this test is restricted only to that time interval and in column 5 (1999-2017) the test uses the full time window from 1999 to 2017; these tests are both displayed to show changes in significance when restricting to the time period before the recent national increases in firearm mortality.

**Appendix Exhibit 11:** State-by-state trajectories of firearm mortality within sub-populations expressed in terms of percent change relative to the baseline value (1999).

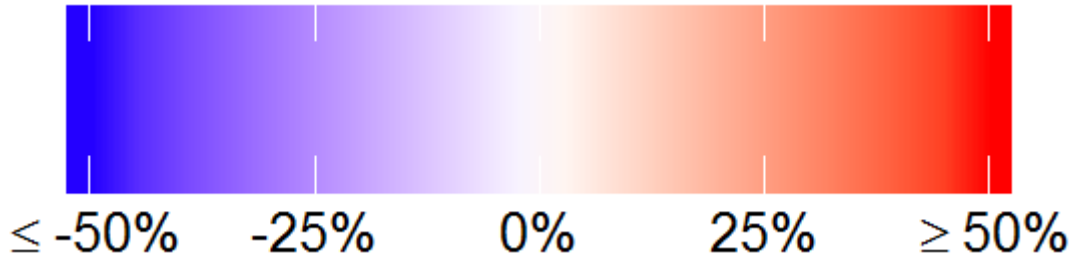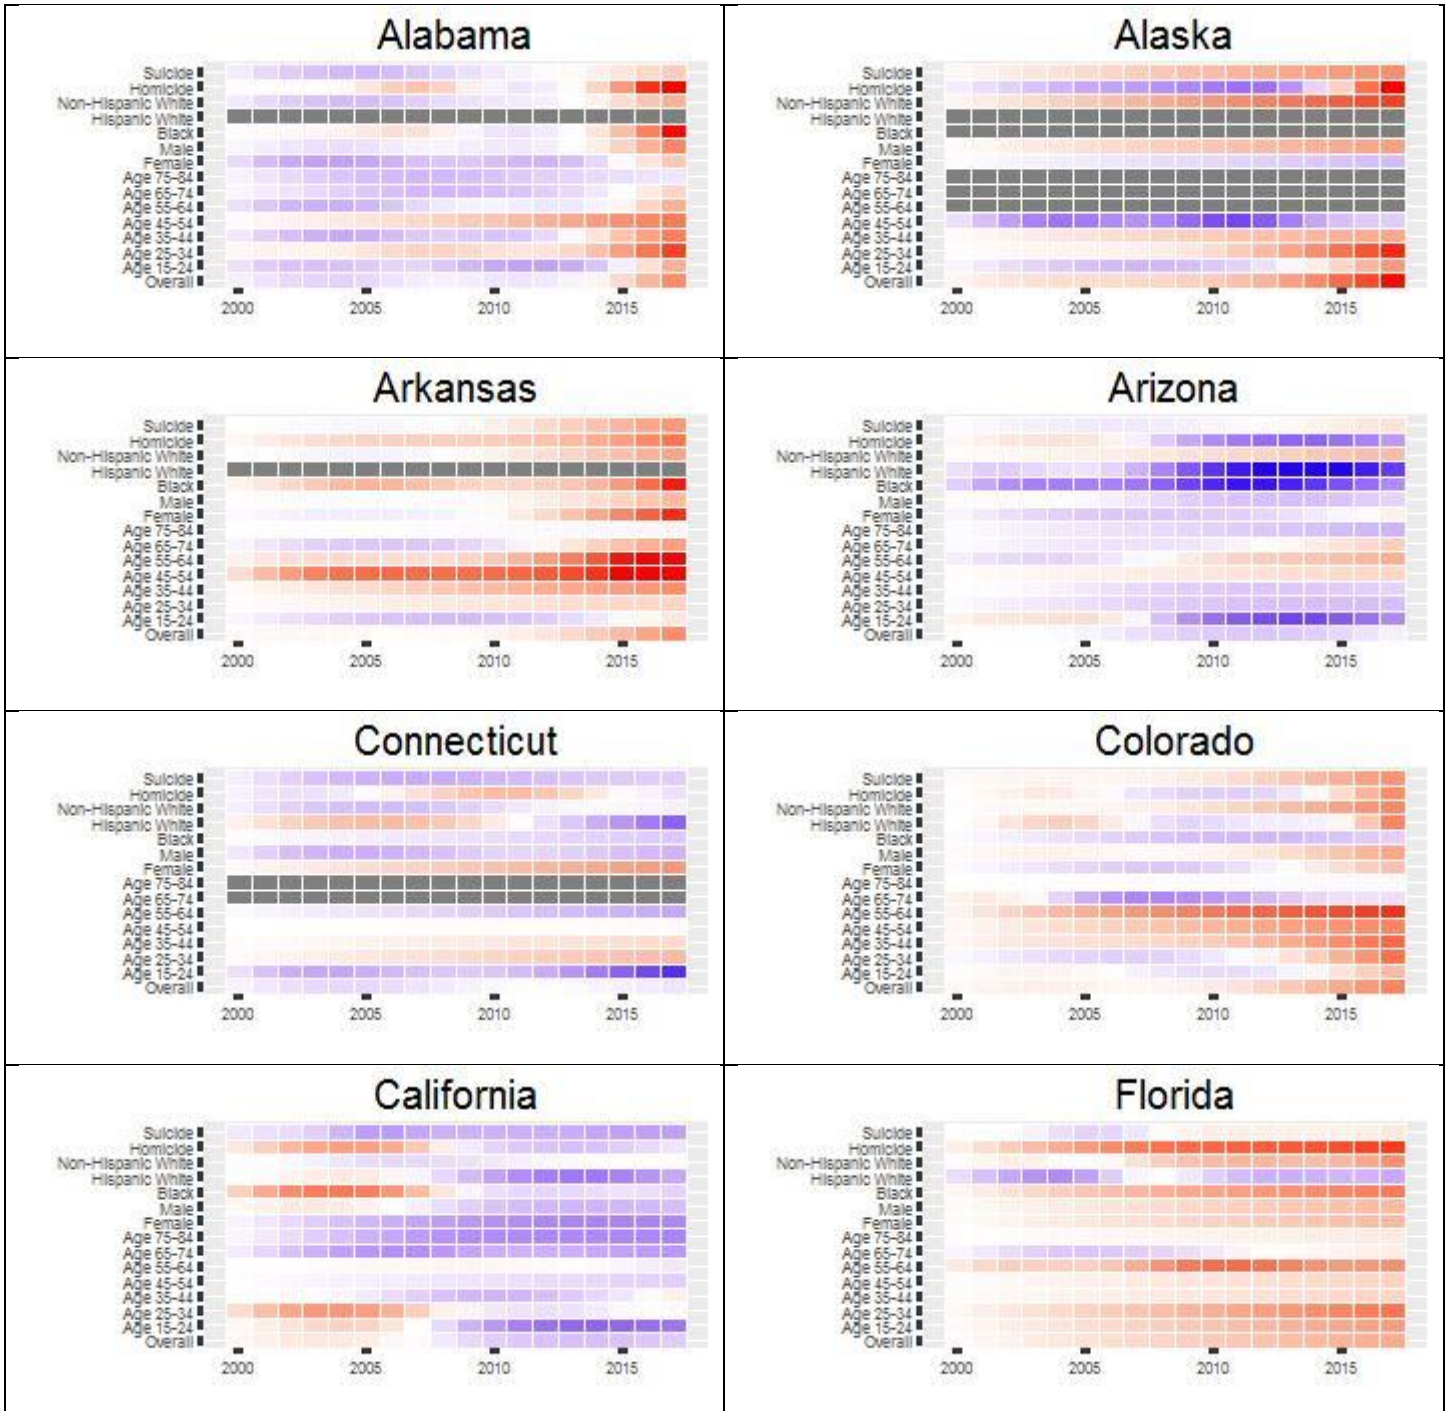



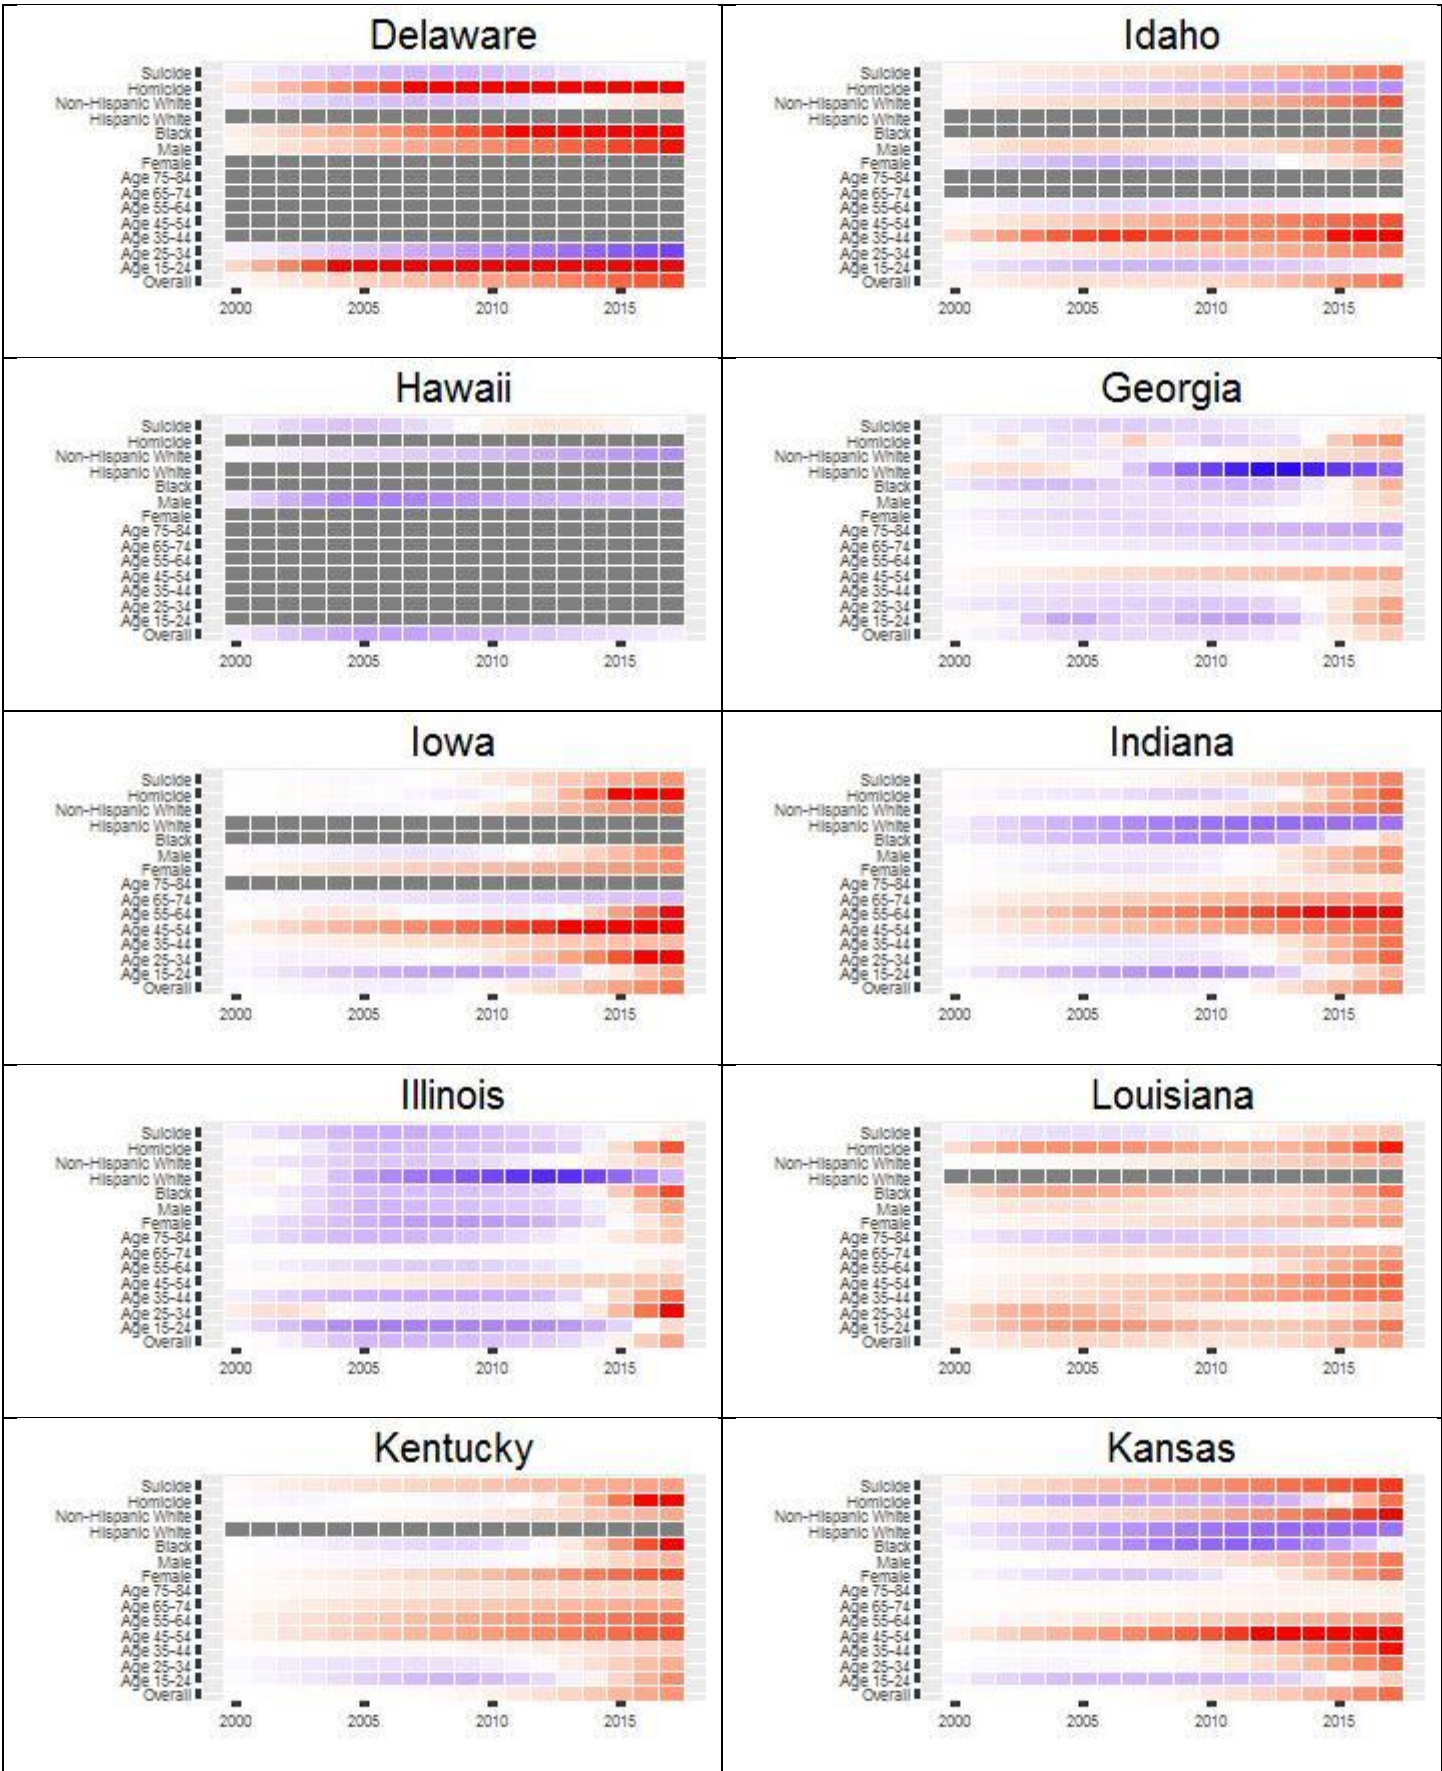

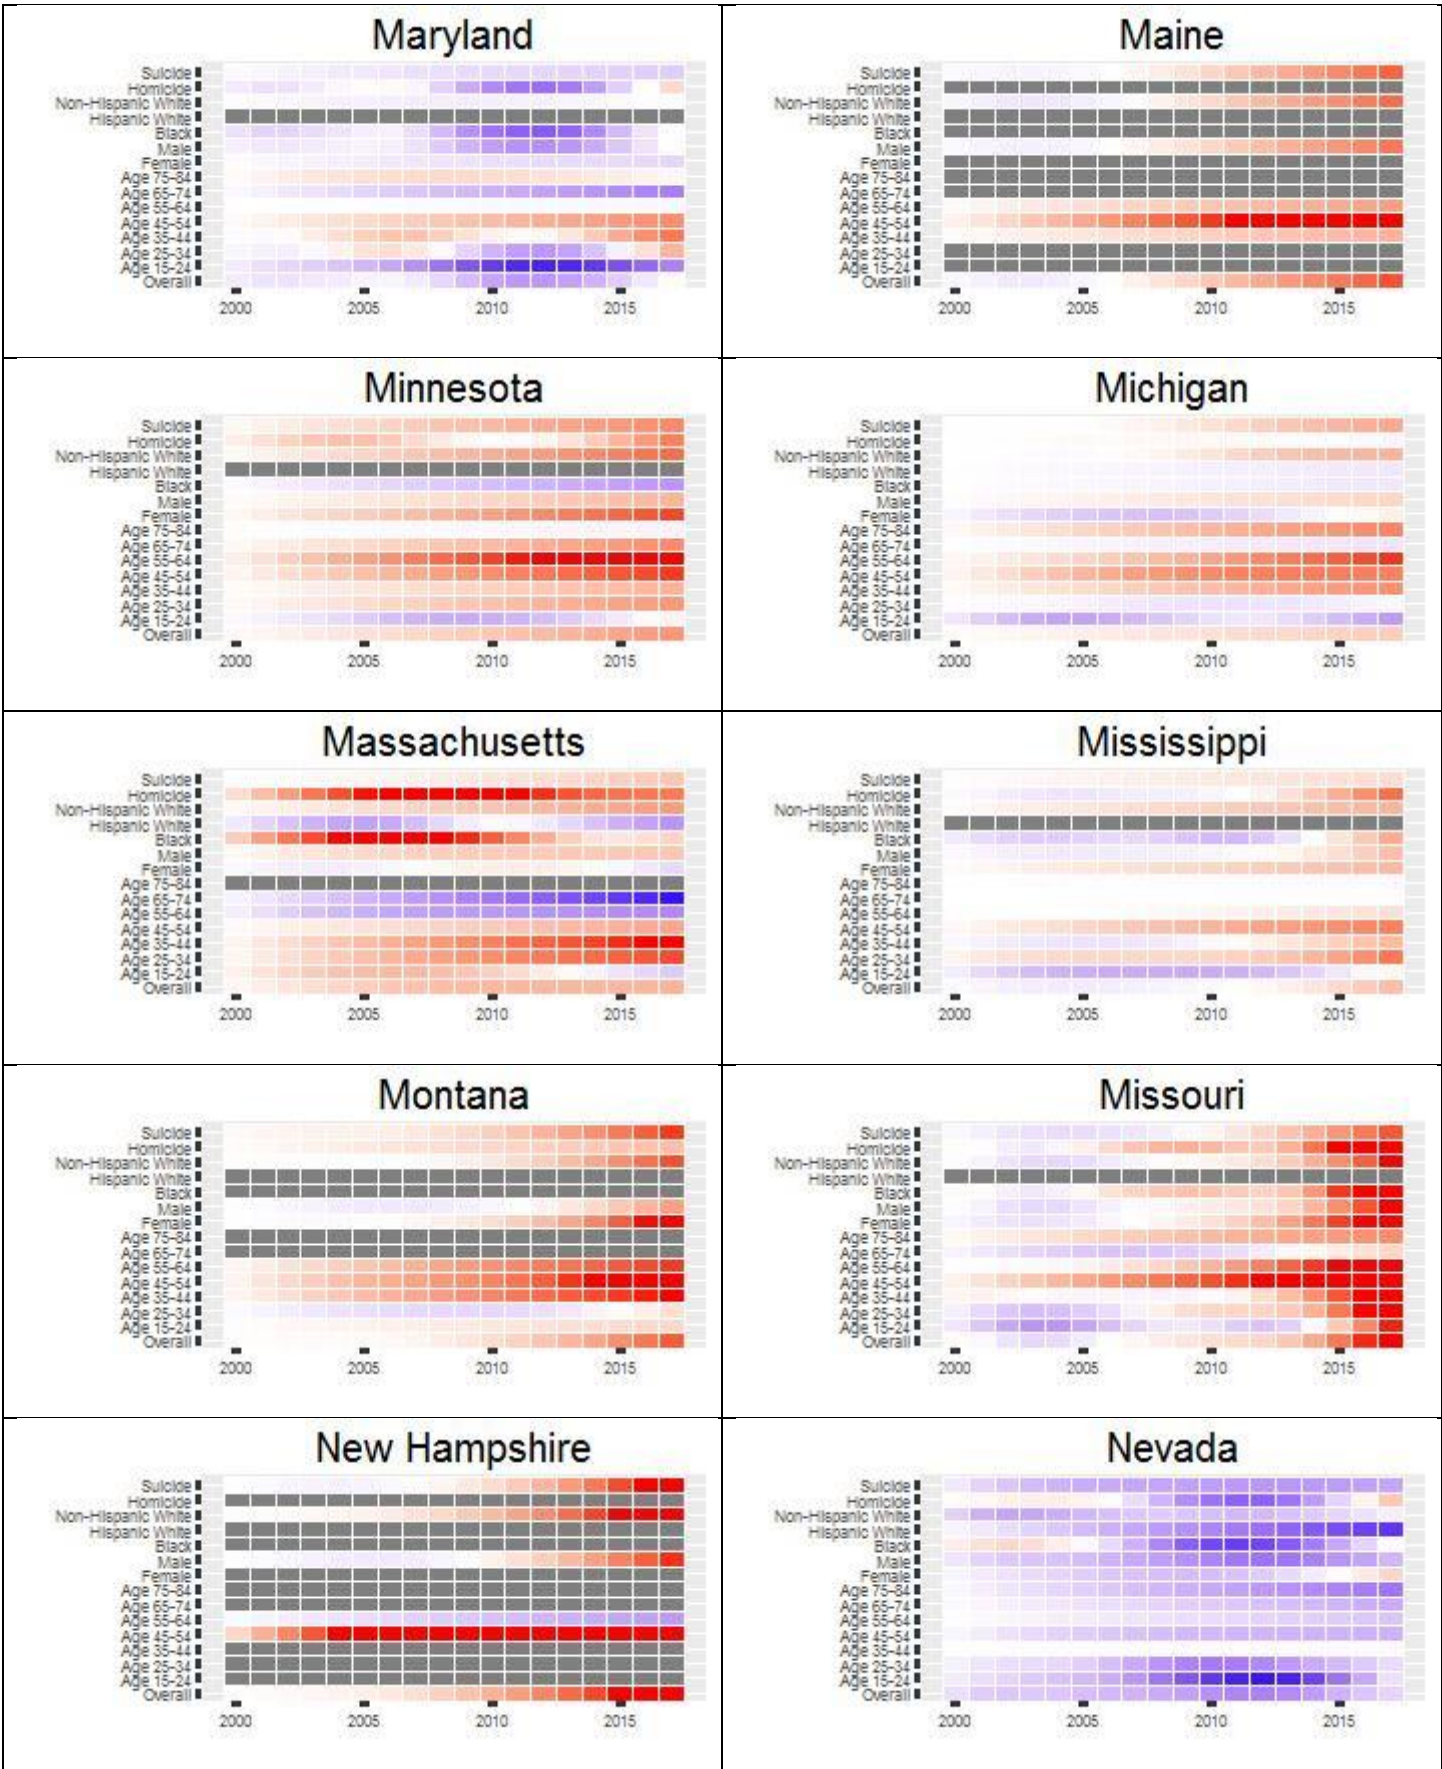

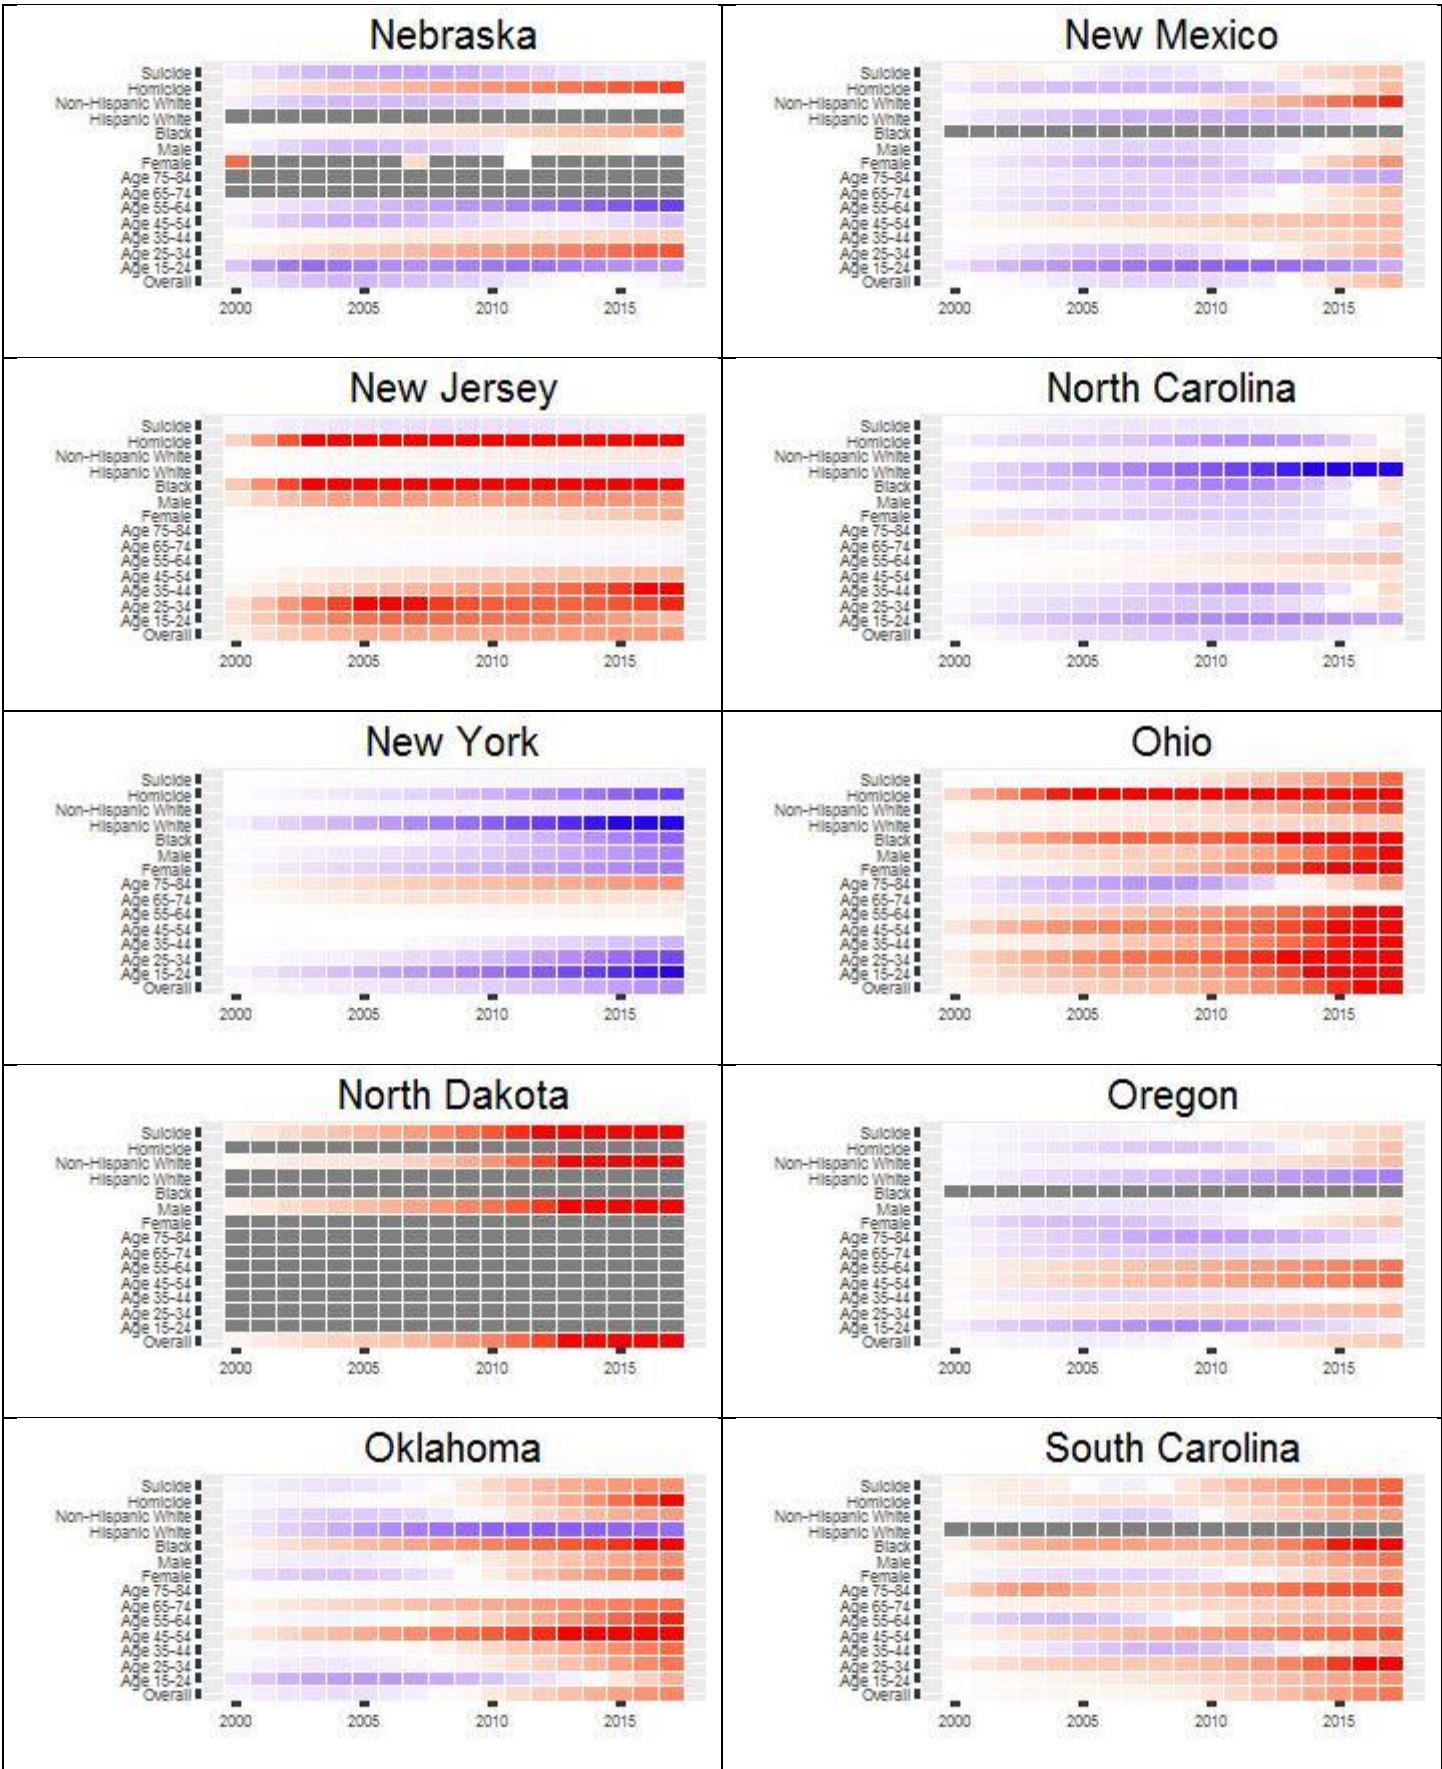

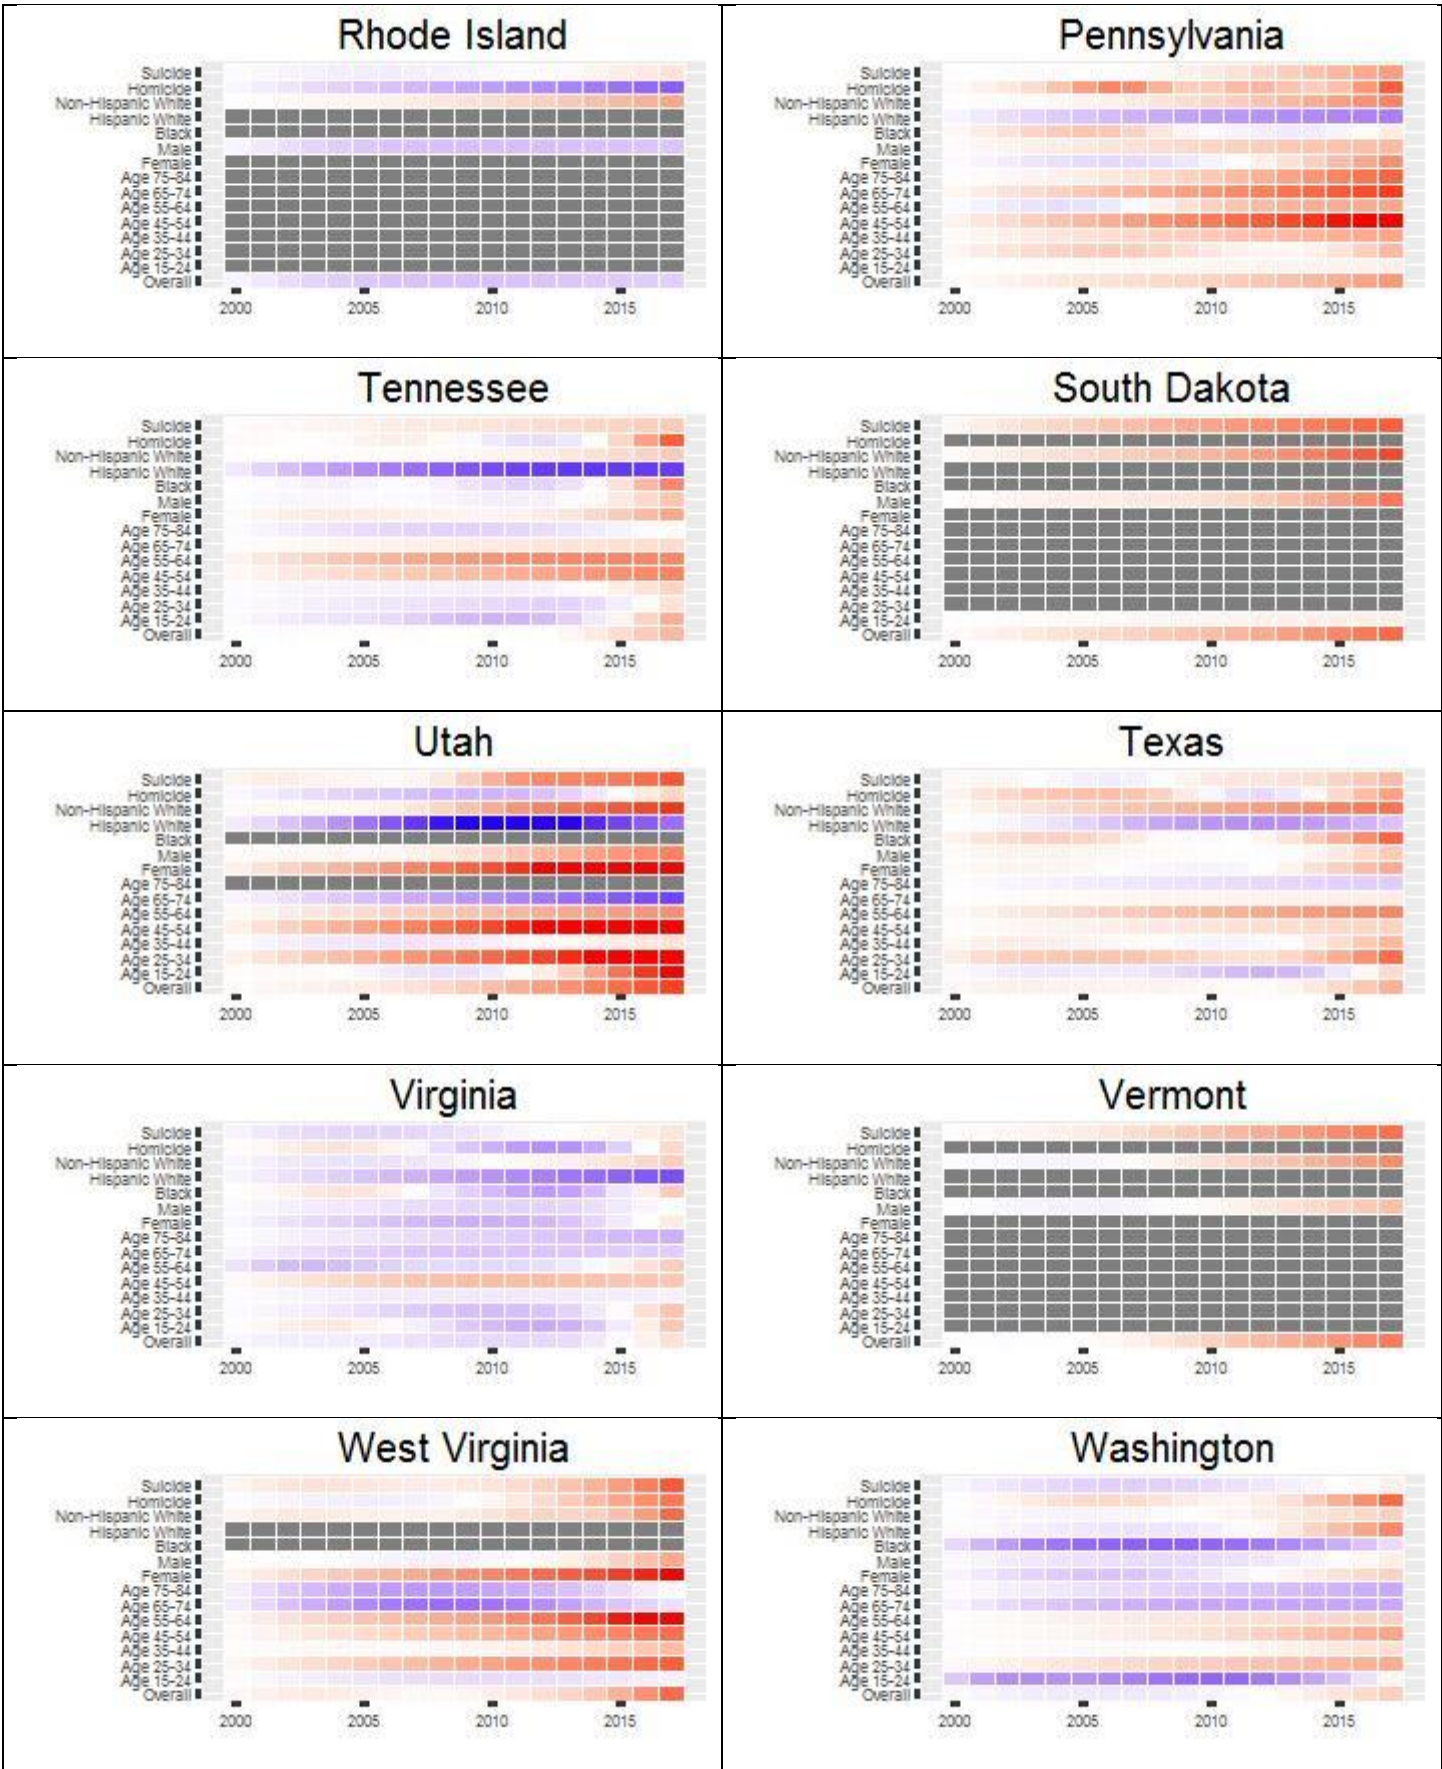

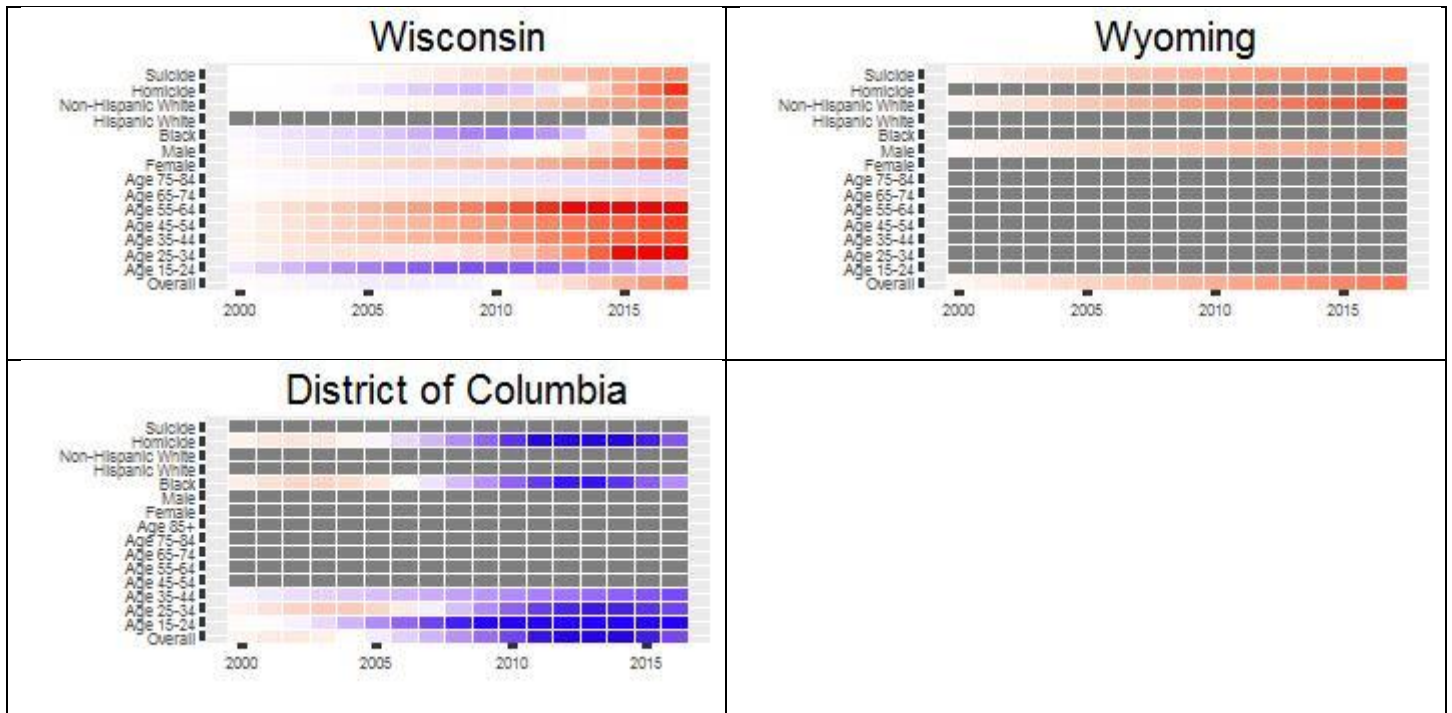

*Note:* Gray cells indicate suppressed counts

*Note 2:* Within each demographic sub-population, and sub-type of firearm mortality, we characterized the trajectories using generalized additive models. However, if over half of the trajectory was suppressed, then linear regression was used instead, to avoid overfitting. If fewer than four time points were unsuppressed, no modeling was performed.
